# Supplementary material for: Tuned activation of MSLN-CAR T cells induces superior antitumor responses in ovarian cancer models
Source: PubMed Central journal article supplement (PMC9906404; doi:10.1136/jitc-2022-005691), 2023-02-01

### Suppl. Fig. 3

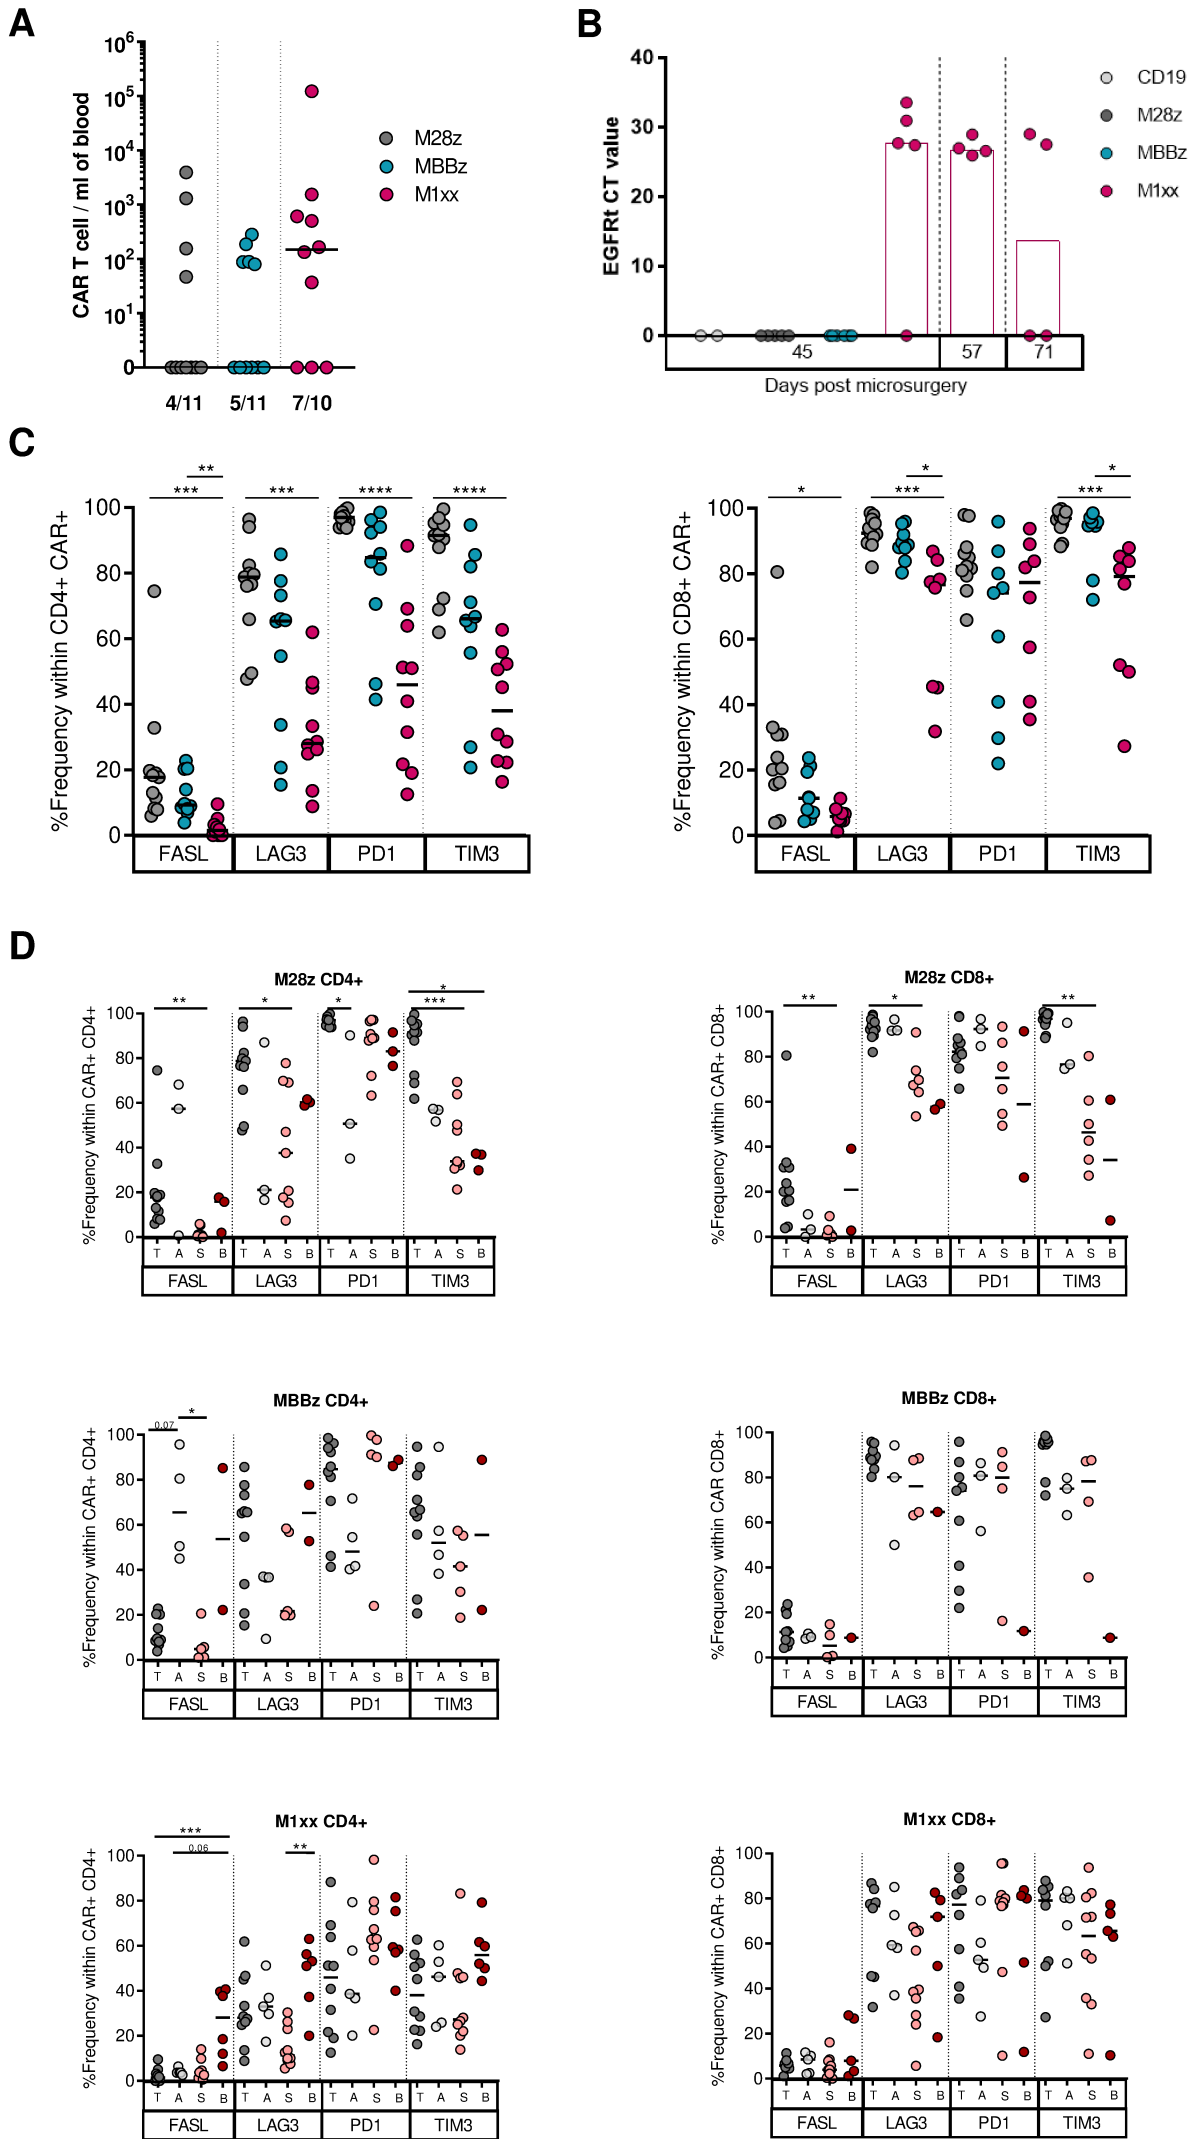

Supplement: jitc-2022-005691supp003.pdf [file jitc-2022-005691supp003.pdf]
