# Supplementary material for: Tuned activation of MSLN-CAR T cells induces superior antitumor responses in ovarian cancer models
Source: PubMed Central journal article supplement (PMC9906404; doi:10.1136/jitc-2022-005691), 2023-02-01
Supplement: jitc-2022-005691supp006.pdf [file jitc-2022-005691supp006.pdf]

**Supplementary Table 2:** Flow Cytometry panels for *in vitro* assays

| <b>Phenotype panel (<i>in vitro</i>)</b>              | <b>Vendor</b>  |
|-------------------------------------------------------|----------------|
| EGFRt/Cetuximab (biotin-conjugated)                   | R&D systems    |
| Streptavidin-PE                                       | BioLegend®     |
| PD-1 FITC                                             | BD Pharmingen™ |
| CD4-BV510                                             | BioLegend®     |
| CD3-AF700                                             | BD Pharmingen™ |
| CD8-APC-Cy7                                           | BD Pharmingen™ |
| LAG3-BV650                                            | BioLegend®     |
| TIM3-BV785/ TIM3-APC                                  | BioLegend®     |
| 7-Aminoactinomycin D (7-AAD)                          | BD Pharmingen™ |
| Cell Trace Violet                                     | Invitrogen     |
| <b>CAR T panel (<i>in vitro</i>)</b>                  | <b>Vendor</b>  |
| EGFRt/Cetuximab (biotin-conjugated)                   | R&D systems    |
| Streptavidin-PE                                       | BioLegend®     |
| CD3-APC                                               | BD Pharmingen™ |
| CD4-FITC                                              | BD Pharmingen™ |
| CD8-APC-Cy7                                           | BD Pharmingen™ |
| 7-Aminoactinomycin D (7-AAD)                          | BD Pharmingen™ |
| <b>Intracellular staining panel (<i>in vitro</i>)</b> | <b>Vendor</b>  |
| CD3-PE-Cy7                                            | BD Pharmingen™ |
| CD4-FITC                                              | BD Pharmingen™ |
| CD8-APC-Cy7                                           | BD Pharmingen™ |
| CD107a-PE                                             | BD Pharmingen™ |
| TNF-eFluor610                                         | Invitrogen     |
| IFN $\gamma$ -AF647                                   | BD Pharmingen™ |
| IL-2-AF700                                            | BioLegend®     |
| <b>T cell phenotype (<i>in vitro</i>)</b>             | <b>Vendor</b>  |
| CD3-PE-Cy7                                            | BD Pharmingen™ |
| CD4-BV510                                             | BioLegend®     |
| CD8-APC-Cy7                                           | BD Pharmingen™ |
| CD45-AF700                                            | BD Pharmingen™ |
| CD45RA-BV785                                          | BioLegend®     |
| CCR7-BV421                                            | BioLegend®     |
| 7-Aminoactinomycin D (7-AAD)                          | BD Pharmingen™ |
