# Supplementary material for: Tuned activation of MSLN-CAR T cells induces superior antitumor responses in ovarian cancer models
Source: PubMed Central journal article supplement (PMC9906404; doi:10.1136/jitc-2022-005691), 2023-02-01
Supplement: jitc-2022-005691supp007.pdf [file jitc-2022-005691supp007.pdf]

**Supplementary Table 3:** Flow Cytometry panels for *ex vivo* assays

| <b>Tumor phenotype (SKOV-3 model)</b>   | <b>Vendor</b>  |
|-----------------------------------------|----------------|
| MSLN-APC                                | R&D systems    |
| CD73-PE                                 | BD Pharmingen™ |
| PD-L1-BV785                             | BioLegend®     |
| FasL-PE-Cy7 (CD178)                     | BioLegend®     |
| CX3CR1-APC-Cy7                          | BioLegend®     |
| Fas-BV510 (CD95)                        | BioLegend®     |
| CD3-AF700                               | BD Pharmingen™ |
| 7-Aminoactinomycin D (7-AAD)            | BD Pharmingen™ |
| <b>T cell phenotype (SKOV-3 model)</b>  | <b>Vendor</b>  |
| MSLN-APC                                | R&D systems    |
| EGFRt/Cetuximab (biotin-conjugated)     | R&D systems    |
| Streptavidin-PE                         | BioLegend®     |
| FasL-PE-Cy7 (CD178)                     | BioLegend®     |
| PD-1-FITC                               | BD Pharmingen™ |
| CD4-BV510                               | BioLegend®     |
| CD3-AF700                               | BD Pharmingen™ |
| CD8-APC-Cy7                             | BD Pharmingen™ |
| CD56-BV421                              | BD Biosciences |
| LAG-3-BV650                             | BioLegend®     |
| TIM-3-BV785                             | BioLegend®     |
| 7-Aminoactinomycin D (7-AAD)            | BD Pharmingen™ |
| <b>T cell phenotype (OVCAR-4 model)</b> | <b>Vendor</b>  |
| MSLN-APC                                | R&D systems    |
| EGFRt/Cetuximab (biotin-conjugated)     | R&D systems    |
| Streptavidin-PE                         | BioLegend®     |
| CD3-PE-Cy7                              | BD Pharmingen™ |
| CD4-BV510                               | BioLegend®     |
| CD8-APC-Cy7                             | BD Pharmingen™ |
| CD45-AF700                              | BD Pharmingen™ |
| CD45RA-BV785                            | BioLegend®     |
| CCR7-BV421                              | BioLegend®     |
