# Supplementary material for: Tuned activation of MSLN-CAR T cells induces superior antitumor responses in ovarian cancer models
Source: PubMed Central journal article supplement (PMC9906404; doi:10.1136/jitc-2022-005691), 2023-02-01
Supplement: jitc-2022-005691supp008.pdf [file jitc-2022-005691supp008.pdf]

**Supplementary Table 4:** List of samples for gene expression analysis

| <b>Samples ID</b> | <b>Mouse ID</b> | <b>CAR</b>       | <b>Sacrifice days post-CAR injection</b> |
|-------------------|-----------------|------------------|------------------------------------------|
| <b>A</b>          |                 | Infused M28z CAR | 0                                        |
| <b>B (pooled)</b> | M11             | Sorted M28z      | 52                                       |
|                   | M17             | Sorted M28z      | 56                                       |
|                   | M19             | Sorted M28z      | 56                                       |
| <b>C</b>          | M14             | Sorted M28z      | 63                                       |
| <b>D</b>          |                 | Infused M1xx CAR | 0                                        |
| <b>E</b>          | M6              | Sorted M1xx      | 63                                       |
| <b>F</b>          | M7              | Sorted M1xx      | 63                                       |
| <b>G</b>          | M20             | Sorted M1xx      | 63                                       |
| <b>H (pooled)</b> | M1              | Sorted M1xx      | 70                                       |
|                   | M5              | Sorted M1xx      | 70                                       |
|                   | M13             | Sorted M1xx      | 70                                       |
| <b>I</b>          | M16             | Sorted M1xx      | 77                                       |
| <b>J (pooled)</b> | M2              | Sorted M1xx      | 77                                       |
|                   | M15             | Sorted M1xx      | 77                                       |
