# Supplementary material for: Tuned activation of MSLN-CAR T cells induces superior antitumor responses in ovarian cancer models
Source: J Immunother Cancer. 2023 Feb 1;11(2):e005691. doi: 10.1136/jitc-2022-005691 (PMC9906404; doi:10.1136/jitc-2022-005691)
Supplement: Supplementary data [file jitc-2022-005691supp009.xlsx]

## Sheet: Suppl Table 5A info
Supplementary Table 5A.
List of the genes used for the Fold Changes (Log2) between M1xx CAR T cells collected from sacrificed mice and the original infused CAR T cell fraction.
Supplementary Table 5B.
List of the genes used for the Fold Changes (Log2) between M28z CAR T cells collected from sacrificed mice and the original infused CAR T cell fraction.
Supplementary Table 5C.
List of the genes used for the Fold Changes (Log2) between M28z CAR T cells and M1xx CAR T cells collected from sacrificed mice.

## Sheet: 5A
gene	fc	z	pvalue2sided
IL5	-6.8353	-3.16659	0.00154
CYP1B1	-6.09919	-2.92831	0.00341
CXCL8	-5.78289	-3.28658	0.00101
LIF	-5.77451	-3.52526	0.000423
PTGER2	-5.48353	-3.2825	0.00103
IL13	-5.15019	-3.13811	0.0017
BATF3	-4.89475	-3.1228	0.00179
IL2RA	-4.81167	-3.588	0.000333
IL17F	-4.38089	-2.10307	0.0355
FOXP3	-4.24843	-2.14117	0.0323
PTGDR2	-4.16513	-1.82746	0.0676
IL4	-4.09898	-1.93903	0.0525
LAIR1	-3.98781	-2.35522	0.0185
CISH	-3.56431	-2.47169	0.0134
IL3RA	-3.48264	-1.6698	0.095
TNFRSF11A	-3.41815	-1.67367	0.0942
IL12RB2	-3.3399	-2.02493	0.0429
IL9	-3.22617	-1.58358	0.113
ACTN1	-3.1982	-2.05394	0.04
CD38	-3.04437	-2.11418	0.0345
PHGDH	-2.70174	-1.75669	0.079
IL23A	-2.60992	-1.50176	0.133
EXO1	-2.53923	-1.65657	0.0976
MAML3	-2.53797	-1.20413	0.229
XRCC2	-2.53366	-1.59972	0.11
SLC7A11	-2.53211	-1.30455	0.192
RRM2	-2.52455	-2.26585	0.0235
PYCR1	-2.49078	-1.42959	0.153
GZMB	-2.48208	-2.44306	0.0146
MYB	-2.44934	-1.61236	0.107
HK2	-2.44108	-1.55954	0.119
PDGFRB	-2.43158	-1.24217	0.214
PCLAF	-2.32064	-1.40304	0.161
LTA	-2.27622	-1.80831	0.0706
NDC1	-2.25964	-1.34134	0.18
UBE2T	-2.23339	-1.65118	0.0987
ITGA1	-2.21786	-1.54443	0.122
MT2A	-2.1036	-1.91344	0.0557
PSAT1	-2.08418	-1.33609	0.182
CD68	-2.03712	-1.18446	0.236
MYBL2	-2.00704	-1.60665	0.108
NME1	-2.0053	-1.64162	0.101
TYMS	-1.98975	-1.70669	0.0879
SRM	-1.93481	-1.61648	0.106
CLSPN	-1.93416	-1.4775	0.14
HJURP	-1.88983	-1.39364	0.163
BUB1	-1.88853	-1.45521	0.146
KIF2C	-1.86842	-1.36473	0.172
CDC20	-1.85928	-1.52779	0.127
CENPA	-1.85631	-1.31537	0.188
DTL	-1.83725	-1.17488	0.24
EME1	-1.83329	-1.09064	0.275
CCR2	-1.82725	-1.39116	0.164
NCAPH	-1.82224	-1.4501	0.147
CCNA1	-1.82079	-0.897389	0.37
BRIP1	-1.79101	-1.28032	0.2
FAH	-1.78647	-1.20808	0.227
SOCS2	-1.785	-1.14831	0.251
SMC2	-1.78414	-1.46874	0.142
RAD51AP1	-1.78167	-1.20249	0.229
CCNA2	-1.78044	-1.49381	0.135
BRCA1	-1.76021	-1.16871	0.243
RRM1	-1.75474	-1.31882	0.187
IFNGR2	-1.75402	-0.892933	0.372
GAD1	-1.70662	-0.833566	0.405
ENO1	-1.70624	-1.59434	0.111
LTB	-1.70403	-1.67186	0.0946
SOS1	-1.70333	-1.43188	0.152
CDCA5	-1.68183	-1.2705	0.204
CDKN1A	-1.67479	-1.3221	0.186
SGO2	-1.67083	-1.18341	0.237
UBE2C	-1.66062	-1.36542	0.172
CSF2	-1.65937	-1.29481	0.195
RAD51	-1.63852	-1.13615	0.256
FH	-1.63221	-1.26218	0.207
USP18	-1.61632	-0.982059	0.326
NEK2	-1.61222	-1.16318	0.245
IKZF2	-1.60917	-1.11194	0.266
FANCA	-1.6051	-1.19535	0.232
FOXM1	-1.60445	-1.17421	0.24
IRF4	-1.60256	-1.35466	0.176
MKI67	-1.60049	-1.33419	0.182
GTSE1	-1.5959	-1.21474	0.224
CDCA8	-1.58222	-1.08625	0.277
PPAT	-1.58112	-1.13515	0.256
CTPS1	-1.58111	-1.23268	0.218
HSPE1	-1.57925	-1.4682	0.142
FANCD2	-1.56473	-1.16528	0.244
NCR3	-1.5644	-1.11514	0.265
CCNB2	-1.55593	-1.15982	0.246
NQO1	-1.55527	-0.997729	0.318
IL22	-1.53039	-0.777087	0.437
PLK1	-1.52341	-1.18983	0.234
PGD	-1.49829	-1.18377	0.237
PSMA3	-1.49788	-1.29896	0.194
IKZF4	-1.48305	-0.92535	0.355
CD7	-1.48114	-1.21344	0.225
IMPDH2	-1.48106	-1.16275	0.245
BUB1B	-1.47396	-1.08716	0.277
SLC16A1	-1.4619	-1.10579	0.269
MTHFD1	-1.46068	-1.23936	0.215
AFDN	-1.43278	-0.889022	0.374
TPX2	-1.41174	-1.05983	0.289
FANCI	-1.40895	-1.11193	0.266
PSMA2	-1.40766	-1.27746	0.201
TIMM23	-1.39306	-1.10074	0.271
NCAPG2	-1.3915	-1.128	0.259
CD45RA	-1.38727	-0.871277	0.384
SLC7A5	-1.38604	-1.18324	0.237
GRPEL1	-1.37765	-0.866294	0.386
MX1	-1.36182	-1.13498	0.256
RPTOR	-1.3558	-0.929715	0.353
NPM1	-1.34014	-1.35126	0.177
NDUFAB1	-1.33837	-1.17095	0.242
CD8B	-1.33832	-1.06731	0.286
OAS1	-1.30969	-0.964716	0.335
EGFR	-1.308	-1.29435	0.196
MYC	-1.29461	-0.968279	0.333
TIMELESS	-1.28414	-0.967524	0.333
UCK2	-1.27539	-0.941679	0.346
MIF	-1.26882	-1.179	0.238
IDH3A	-1.24769	-0.963638	0.335
CCNC	-1.23612	-0.973601	0.33
CCR7	-1.22743	-0.858975	0.39
CAD	-1.22402	-0.940624	0.347
STAT1	-1.21788	-1.1372	0.255
TIMM17A	-1.21239	-0.966393	0.334
IL4R	-1.20028	-1.00542	0.315
KPNA2	-1.20005	-1.04241	0.297
TK1	-1.19869	-0.882069	0.378
ADK	-1.1841	-0.93833	0.348
TFDP1	-1.15738	-0.986054	0.324
NAA20	-1.14331	-0.877489	0.38
PRIM1	-1.14073	-0.847272	0.397
BCL2	-1.12605	-0.895371	0.371
GART	-1.12444	-0.893322	0.372
PSMA6	-1.10601	-0.986584	0.324
LDHA	-1.10588	-1.07779	0.281
PPIA	-1.09308	-1.11319	0.266
CRLF2	-1.08233	-0.581954	0.561
SLC3A2	-1.06241	-0.886335	0.375
CD40LG	-1.05715	-0.901282	0.367
MAPK8	-1.05691	-0.743711	0.457
PGAM1	-1.05147	-1.00503	0.315
SLC1A5	-1.05046	-0.81479	0.415
AFMID	-1.04902	-0.614325	0.539
IFI6	-1.04594	-0.747561	0.455
IFIT3	-1.04336	-0.542875	0.587
EZH2	-1.03702	-0.857029	0.391
IFITM3	-1.02568	-0.705858	0.48
NME2	-1.0244	-0.999988	0.317
TKT	-1.00503	-0.84718	0.397
MSH2	-1.00491	-0.76679	0.443
SHMT2	-1.00193	-0.791896	0.428
GNG10	-0.99801	-0.69604	0.486
AURKA	-0.995665	-0.67003	0.503
MTHFD1L	-0.991469	-0.763547	0.445
TXNRD1	-0.991347	-0.837526	0.402
UQCRQ	-0.97824	-0.836569	0.403
PRDX1	-0.976865	-0.935423	0.35
CKAP5	-0.975846	-0.761181	0.447
MTHFD2	-0.972297	-0.809849	0.418
PRIM2	-0.972031	-0.76913	0.442
TXN	-0.966115	-0.919339	0.358
GOT2	-0.964681	-0.758061	0.448
TP53	-0.953458	-0.791645	0.429
ODC1	-0.949779	-0.785311	0.432
TGIF2	-0.934105	-0.671506	0.502
MDH2	-0.931602	-0.779643	0.436
HSPA9	-0.921083	-0.742043	0.458
TOMM6	-0.920742	-0.697874	0.485
LDHB	-0.915738	-0.90942	0.363
CEACAM1	-0.910333	-0.515913	0.606
NUP205	-0.905067	-0.707658	0.479
GARS	-0.904479	-0.756082	0.45
HADH	-0.90218	-0.661315	0.508
GRAP2	-0.899717	-0.681657	0.495
NCAPD2	-0.898589	-0.774587	0.439
ATOX1	-0.890664	-0.660958	0.509
HSPA4	-0.890513	-0.713857	0.475
TGFBR1	-0.889139	-0.696258	0.486
TFRC	-0.886575	-0.812633	0.416
SDHB	-0.879342	-0.732251	0.464
CASP3	-0.875804	-0.754066	0.451
BRCA2	-0.872008	-0.554305	0.579
TFAM	-0.867096	-0.669528	0.503
FKBP1A	-0.860718	-0.575033	0.565
UPP1	-0.842407	-0.632807	0.527
FDX1	-0.841194	-0.665845	0.506
PYCR3	-0.837601	-0.482709	0.629
POLE	-0.837349	-0.652483	0.514
ALDOA	-0.836343	-0.815686	0.415
RPIA	-0.835128	-0.685472	0.493
GMPS	-0.832283	-0.625181	0.532
MAT2A	-0.829476	-0.748777	0.454
COX7A2	-0.825784	-0.761696	0.446
OAS3	-0.823085	-0.651173	0.515
L2HGDH	-0.822477	-0.481873	0.63
ME2	-0.819659	-0.605684	0.545
UBA5	-0.812464	-0.642347	0.521
NT5E	-0.810529	-0.455078	0.649
COX16	-0.809909	-0.575142	0.565
IGF1R	-0.809341	-0.424059	0.672
IL12A	-0.808933	-0.449116	0.653
SCD	-0.800604	-0.597266	0.55
ACAT1	-0.772824	-0.553771	0.58
COX6C	-0.771205	-0.732065	0.464
IFI30	-0.769529	-0.553799	0.58
GFM1	-0.767832	-0.601568	0.547
UBE2I	-0.763387	-0.652076	0.514
IRF8	-0.762812	-0.399238	0.69
TALDO1	-0.760533	-0.647831	0.517
ACAT2	-0.758227	-0.603789	0.546
BCL2L1	-0.742703	-0.595037	0.552
CDC26	-0.739377	-0.587908	0.557
FASN	-0.736386	-0.596337	0.551
FNIP2	-0.733221	-0.435189	0.663
NDUFA6	-0.729013	-0.642047	0.521
GPI	-0.712892	-0.639412	0.523
GAPDH	-0.705923	-0.720376	0.471
PSMC1	-0.704348	-0.565374	0.572
NDUFB9	-0.699823	-0.612258	0.54
MID1IP1	-0.693474	-0.524229	0.6
ACACA	-0.687944	-0.404106	0.686
MLST8	-0.685293	-0.492781	0.622
OPA1	-0.684316	-0.551625	0.581
SHMT1	-0.67432	-0.46169	0.644
COX7B	-0.673563	-0.606135	0.544
ATP5MF	-0.670482	-0.522662	0.601
RAE1	-0.662914	-0.519063	0.604
RPL3	-0.660119	-0.634191	0.526
NSD2	-0.658795	-0.565318	0.572
PKM	-0.657896	-0.638422	0.523
RBX1	-0.657728	-0.593175	0.553
ZBTB16	-0.656329	-0.393011	0.694
PUDP	-0.655302	-0.398796	0.69
ACAA2	-0.652683	-0.535947	0.592
STAT4	-0.646422	-0.503825	0.614
NPRL3	-0.633819	-0.474923	0.635
ISG15	-0.629643	-0.50783	0.612
IL32	-0.629598	-0.642473	0.521
XCL1/2	-0.628164	-0.476339	0.634
STAM	-0.607639	-0.435627	0.663
NMT1	-0.606446	-0.502494	0.615
SRR	-0.606133	-0.351255	0.725
PSMA7	-0.595132	-0.556655	0.578
ATP5MG	-0.588472	-0.485399	0.627
PYCR2	-0.585841	-0.496462	0.62
HSF2	-0.582496	-0.394518	0.693
GPX1	-0.581124	-0.420399	0.674
COX5A	-0.570287	-0.528004	0.597
NDUFB4	-0.566607	-0.492654	0.622
CS	-0.562803	-0.482378	0.63
TELO2	-0.555352	-0.389531	0.697
LTA4H	-0.554948	-0.418257	0.676
HAVCR2	-0.554533	-0.468808	0.639
PEMT	-0.554374	-0.373034	0.709
UQCR10	-0.548841	-0.440725	0.659
RPLP0	-0.544648	-0.555091	0.579
PGK1	-0.540565	-0.525943	0.599
CD274	-0.539385	-0.319318	0.749
GPX4	-0.536911	-0.453519	0.65
SEC13	-0.532017	-0.436264	0.663
ADAL	-0.527599	-0.320915	0.748
GCLC	-0.526245	-0.357821	0.72
CD8A	-0.523216	-0.48763	0.626
NDUFA4	-0.52039	-0.478949	0.632
TFB2M	-0.519202	-0.380664	0.703
COX5B	-0.51611	-0.471396	0.637
NFIL3	-0.508177	-0.376975	0.706
PARP1	-0.507258	-0.436457	0.663
JAK2	-0.502794	-0.368626	0.712
SNF8	-0.492297	-0.414985	0.678
IFI35	-0.491283	-0.352348	0.725
PSMD13	-0.4909	-0.419907	0.675
COX6A1	-0.49045	-0.454775	0.649
PTCD1	-0.486096	-0.297081	0.766
LAMTOR1	-0.477762	-0.352951	0.724
TECR	-0.475542	-0.393809	0.694
PDHA1	-0.468798	-0.355495	0.722
GOT1	-0.467346	-0.305467	0.76
PSMB1	-0.465648	-0.398544	0.69
CCL28	-0.460269	-0.294966	0.768
PGM2	-0.459954	-0.348701	0.727
MYBL1	-0.456025	-0.25588	0.798
ATP5PD	-0.449322	-0.384638	0.701
NUP62	-0.441779	-0.35011	0.726
PPT2	-0.436649	-0.248996	0.803
PSME2	-0.430742	-0.418152	0.676
ABL1	-0.429913	-0.290908	0.771
OAT	-0.429192	-0.313934	0.754
GATA3	-0.428701	-0.388646	0.698
COX6B1	-0.418704	-0.388823	0.697
PFKM	-0.415806	-0.271725	0.786
CTSW	-0.409094	-0.363996	0.716
OAS2	-0.404317	-0.347239	0.728
NEDD8	-0.394475	-0.346323	0.729
THBS1	-0.389414	-0.213631	0.831
HPRT1	-0.381568	-0.330447	0.741
TRIM25	-0.375759	-0.302934	0.762
CD247	-0.370672	-0.355986	0.722
MFN2	-0.369235	-0.282393	0.778
LEF1	-0.365234	-0.295536	0.768
MTHFS	-0.359172	-0.264714	0.791
BRCC3	-0.350849	-0.265165	0.791
PIK3R4	-0.349701	-0.250321	0.802
UCK1	-0.348941	-0.242273	0.809
WRN	-0.347828	-0.230947	0.817
UBE2F	-0.347501	-0.285384	0.775
IL10RA	-0.347462	-0.30434	0.761
COX7C	-0.334504	-0.297776	0.766
PDCD1LG2	-0.330323	-0.194723	0.846
TXN2	-0.328296	-0.26404	0.792
NBL1	-0.326554	-0.212517	0.832
GBA	-0.325081	-0.239755	0.811
NDUFS8	-0.324505	-0.267983	0.789
FABP5	-0.320082	-0.297935	0.766
NFE2L2	-0.313836	-0.251451	0.801
MAP2K1	-0.312497	-0.258295	0.796
HMGCR	-0.31051	-0.228849	0.819
SREBF1	-0.306477	-0.225842	0.821
SMAD2	-0.305963	-0.25295	0.8
PPP2R5D	-0.301638	-0.238419	0.812
NDUFA12	-0.301477	-0.259989	0.795
NFKB1	-0.301276	-0.234452	0.815
LAMTOR5	-0.293062	-0.260998	0.794
PNP	-0.290446	-0.25183	0.801
PFKP	-0.288678	-0.249566	0.803
GFER	-0.266676	-0.16929	0.866
ACADVL	-0.264499	-0.245717	0.806
VEGFA	-0.26372	-0.14448	0.885
SOD1	-0.263037	-0.238197	0.812
PDK3	-0.262698	-0.188427	0.851
KEAP1	-0.260015	-0.199962	0.842
ZNF93	-0.257224	-0.145117	0.885
KYAT1	-0.255424	-0.154637	0.877
COPS6	-0.254853	-0.222448	0.824
DAP3	-0.24681	-0.209268	0.834
ATF4	-0.236864	-0.22758	0.82
SKP1	-0.232379	-0.217199	0.828
ITGAM	-0.231229	-0.165232	0.869
NDUFA13	-0.22638	-0.212086	0.832
LAMTOR2	-0.225552	-0.180792	0.857
HEXB	-0.22105	-0.175857	0.86
NDUFA7	-0.221048	-0.17714	0.859
GCDH	-0.219692	-0.150651	0.88
OXSM	-0.218513	-0.138341	0.89
RANBP2	-0.218201	-0.174395	0.862
SMARCA4	-0.217506	-0.178735	0.858
ATP6V1F	-0.210782	-0.185033	0.853
MSRB2	-0.208978	-0.125021	0.901
DVL2	-0.201208	-0.139848	0.889
RPL23	-0.198662	-0.201164	0.841
NDUFB7	-0.197074	-0.166411	0.868
CD86	-0.192249	-0.115582	0.908
NFS1	-0.191017	-0.140105	0.889
MTCP1	-0.19098	-0.107415	0.914
STAM2	-0.190784	-0.131739	0.895
GZMA	-0.182809	-0.185366	0.853
ADAR	-0.181379	-0.172089	0.863
TICAM1	-0.176087	-0.135039	0.893
IFNAR1	-0.173793	-0.137249	0.891
NOTCH2	-0.173283	-0.141252	0.888
NDUFA2	-0.172021	-0.122079	0.903
PSMB10	-0.167496	-0.152711	0.879
RUNX3	-0.165135	-0.143848	0.886
GPS1	-0.159531	-0.13074	0.896
ZNF254	-0.158509	-0.102349	0.918
PCK2	-0.155358	-0.116117	0.908
PPP3CA	-0.154577	-0.107298	0.915
SLC25A6	-0.154007	-0.145926	0.884
CTCF	-0.152577	-0.128696	0.898
DHFR2	-0.144717	-0.094626	0.925
MAP3K7	-0.138664	-0.11127	0.911
PRKAB1	-0.13502	-0.100023	0.92
NDUFA1	-0.134963	-0.126064	0.9
HRAS	-0.13327	-0.0896188	0.929
RDH14	-0.13297	-0.0937151	0.925
SEC22B	-0.131683	-0.102897	0.918
GRK2	-0.130233	-0.120333	0.904
ACSL5	-0.129458	-0.10833	0.914
SLAMF7	-0.128935	-0.0980167	0.922
ERAP2	-0.128335	-0.112064	0.911
UMPS	-0.127414	-0.0786775	0.937
MAGED1	-0.127017	-0.0948648	0.924
IL2RB	-0.117961	-0.11055	0.912
DCK	-0.112795	-0.098772	0.921
NDUFB1	-0.112197	-0.0990872	0.921
FNIP1	-0.10069	-0.0744613	0.941
CAB39	-0.0958894	-0.084881	0.932
AP2S1	-0.0951744	-0.0807939	0.936
SLC2A1	-0.0942306	-0.0650887	0.948
HK1	-0.0941622	-0.0829749	0.934
NDUFB8	-0.0931182	-0.0824252	0.934
ICOS	-0.0925917	-0.0764254	0.939
GUSB	-0.0849917	-0.0706572	0.944
PIK3CD	-0.0756521	-0.0703011	0.944
MCAT	-0.072515	-0.0433381	0.965
UBE2V1	-0.0724128	-0.067593	0.946
SQSTM1	-0.0658112	-0.0564236	0.955
CD80	-0.064203	-0.0444841	0.965
CHMP6	-0.062801	-0.0478694	0.962
KYAT3	-0.0569846	-0.0454205	0.964
ATP5F1D	-0.0562393	-0.0471456	0.962
MAPKAP1	-0.0545793	-0.0437779	0.965
PSMB3	-0.0498975	-0.0451478	0.964
PRDX5	-0.0480342	-0.0407525	0.967
ACOT2	-0.046201	-0.033329	0.973
NDUFS7	-0.0440708	-0.0349001	0.972
IDH3B	-0.0421278	-0.0354388	0.972
IKBKE	-0.0358619	-0.0312589	0.975
CALM1	-0.028324	-0.0236549	0.981
OMA1	-0.0232442	-0.0168687	0.987
CCL1	-0.0226052	-0.0171447	0.986
TPR	-0.021825	-0.0174481	0.986
IL26	-0.012572	-0.00870791	0.993
RBBP5	-0.00958219	-0.00712586	0.994
WASHC4	-0.00355809	-0.00270704	0.998
NDUFA3	-0.00163415	-0.00138457	0.999
SLC25A20	-0.000456987	-0.000375912	1
XAF1	0.00020072	0.000159767	1
PSPH	0.00366442	0.00213527	0.998
NFATC2IP	0.00476552	0.0038482	0.997
CHMP4A	0.00765144	0.00682973	0.995
MPC1	0.0142056	0.0102587	0.992
PRKAG1	0.0167495	0.0127303	0.99
ZNF682	0.0172558	0.0103903	0.992
DGUOK	0.0181628	0.0155839	0.988
SMAD3	0.019543	0.0166939	0.987
CBR4	0.0223408	0.016498	0.987
RPS6KB1	0.0226635	0.0182557	0.985
NRAS	0.0258025	0.0207486	0.983
ACSF2	0.0284143	0.0163242	0.987
PRPS1	0.037561	0.0270101	0.978
DERA	0.042338	0.0295795	0.976
DHRS4	0.0445808	0.0338846	0.973
AMPD2	0.0458985	0.0339056	0.973
AKT1	0.0477913	0.0402871	0.968
CTNNB1	0.0525511	0.0482013	0.962
GNAI2	0.061627	0.0610439	0.951
FDXR	0.0629437	0.0368505	0.971
SLC16A6	0.063272	0.0414171	0.967
SERINC5	0.0651139	0.0528667	0.958
ATG101	0.0701691	0.0515688	0.959
PIDD1	0.076111	0.051582	0.959
NFKB2	0.0774468	0.0671174	0.946
SOCS4	0.0775133	0.0601949	0.952
CDC42	0.0781168	0.0754879	0.94
GLUD1/2	0.0788772	0.0707227	0.944
NADK	0.0793493	0.0619117	0.951
ARID2	0.0821457	0.0685791	0.945
MAX	0.0824897	0.0731646	0.942
CCR4	0.0877936	0.0729681	0.942
NDUFB11	0.0878461	0.0742022	0.941
ASL	0.0880069	0.064708	0.948
COX4I1	0.090664	0.0841124	0.933
SDHC	0.0907476	0.0734519	0.941
GMPR2	0.0953804	0.0745965	0.941
ECHS1	0.0955359	0.0658226	0.948
MAP2K2	0.10052	0.0844598	0.933
ASNS	0.102107	0.0714889	0.943
HSF1	0.102431	0.0860255	0.931
LAMP2	0.102668	0.08666	0.931
PEBP1	0.104102	0.0872756	0.93
ICAM1	0.106009	0.0787215	0.937
ADD1	0.106724	0.0927389	0.926
AKT2	0.108005	0.09214	0.927
NDUFB10	0.11526	0.0977305	0.922
SLC2A11	0.116339	0.0700665	0.944
SMAD5	0.117001	0.0794494	0.937
ERN1	0.123047	0.0995288	0.921
SELPLG	0.130066	0.0898298	0.928
COX8A	0.131574	0.123441	0.902
MPC2	0.13664	0.111001	0.912
WAS	0.138431	0.124015	0.901
ADA	0.140271	0.110864	0.912
HACD4	0.1403	0.113373	0.91
CD96	0.141865	0.125901	0.9
HIF1A	0.141975	0.131705	0.895
MTOR	0.142242	0.10973	0.913
RELA	0.143218	0.117623	0.906
IDH1	0.144458	0.101831	0.919
HDAC8	0.147794	0.111015	0.912
ZNF85	0.149016	0.0924119	0.926
TBK1	0.15682	0.122636	0.902
KDM3B	0.157015	0.123556	0.902
IDH2	0.163712	0.147461	0.883
ATP5ME	0.164672	0.146103	0.884
BTBD6	0.165636	0.121563	0.903
MAPK1	0.168639	0.147371	0.883
GLUL	0.172612	0.143787	0.886
UQCR11	0.1762	0.119337	0.905
NFAT5	0.176795	0.12636	0.899
HADHB	0.178712	0.148857	0.882
DGLUCY	0.180606	0.13714	0.891
RAC2	0.182873	0.181255	0.856
RARG	0.183071	0.140726	0.888
PIK3R2	0.183348	0.122348	0.903
SH2D1A	0.18345	0.164848	0.869
PPARG	0.184639	0.134124	0.893
HSD17B8	0.188554	0.121865	0.903
AK3	0.188564	0.14736	0.883
ARAF	0.193089	0.139864	0.889
AKT1S1	0.193843	0.13302	0.894
NADK2	0.194568	0.127125	0.899
TNFSF13B	0.206043	0.120663	0.904
TRAF3	0.207129	0.173718	0.862
ERCC6	0.217327	0.132743	0.894
MTF1	0.219188	0.158607	0.874
TIMP1	0.221097	0.177375	0.859
GLUD1	0.225208	0.201548	0.84
IDH3G	0.234285	0.188537	0.85
NRF1	0.235481	0.153614	0.878
BAD	0.238626	0.171831	0.864
UCKL1	0.240924	0.201221	0.841
GAPVD1	0.241222	0.196877	0.844
APOM	0.269154	0.152276	0.879
YWHAZ	0.270229	0.270277	0.787
STAT5A	0.276988	0.219596	0.826
ACVR1B	0.278587	0.173735	0.862
ZNF100	0.280298	0.183933	0.854
ZNF675	0.281271	0.183531	0.854
PTEN	0.282979	0.256077	0.798
IRF1	0.285821	0.26044	0.795
KMT2D	0.287526	0.234756	0.814
CREB1	0.288835	0.245976	0.806
ACOX1	0.292124	0.219454	0.826
USP15	0.293753	0.248706	0.804
APRT	0.294816	0.260477	0.794
PIK3R1	0.300778	0.239619	0.811
NDUFB2	0.304266	0.273557	0.784
GADD45B	0.30462	0.238087	0.812
JAK1	0.308399	0.283516	0.777
RAI1	0.309189	0.200901	0.841
HEXA	0.310433	0.251949	0.801
PECAM1	0.314715	0.273238	0.785
RPS6KA1	0.316649	0.277259	0.782
RPS6KB2	0.324488	0.243002	0.808
ARPC4	0.32916	0.327311	0.743
CXCL10	0.330574	0.198518	0.843
PRICKLE3	0.334142	0.221633	0.825
NSD1	0.335811	0.281988	0.778
MGST3	0.338924	0.282994	0.777
STK11	0.352168	0.294603	0.768
TRIM26	0.35987	0.294882	0.768
GNS	0.365254	0.258051	0.796
PRKCB	0.369566	0.317815	0.751
PDPK1	0.380167	0.288172	0.773
FAHD1	0.390412	0.265991	0.79
DOCK2	0.392736	0.362779	0.717
SP100	0.392976	0.351708	0.725
COX14	0.3963	0.333412	0.739
ZNF253	0.404563	0.270006	0.787
CD63	0.408678	0.374124	0.708
TRIM33	0.410015	0.341411	0.733
IL4I1	0.410284	0.224081	0.823
DIABLO	0.41077	0.340611	0.733
GLRX	0.413618	0.358242	0.72
ALDOC	0.413727	0.308472	0.758
LAMP1	0.423096	0.38919	0.697
GLS	0.426859	0.393528	0.694
NEU1	0.427863	0.317746	0.751
MAP2K7	0.428549	0.337989	0.735
WDR45	0.429461	0.302177	0.763
PRKAA1	0.436457	0.370115	0.711
LCK	0.443349	0.422751	0.672
DECR1	0.444259	0.382351	0.702
TAOK2	0.44524	0.336123	0.737
ATG2B	0.448207	0.34667	0.729
BID	0.453345	0.290668	0.771
SLC16A13	0.4574	0.293376	0.769
IRF7	0.46491	0.378574	0.705
IL12RB1	0.465363	0.394215	0.693
SOCS5	0.465443	0.311636	0.755
SELENOK	0.466368	0.269076	0.788
BRAF	0.46782	0.358975	0.72
TSC2	0.468578	0.352022	0.725
ITCH	0.471948	0.401533	0.688
PLA2G15	0.487442	0.304396	0.761
TGFB1	0.49655	0.457411	0.647
STAT2	0.508051	0.35619	0.722
ENTPD1	0.511122	0.454776	0.649
EEA1	0.512137	0.375872	0.707
LAMTOR4	0.514019	0.458419	0.647
PRKAB2	0.515633	0.361205	0.718
HLA-A	0.515939	0.526455	0.599
USP8	0.518433	0.411502	0.681
TIGAR	0.519259	0.333621	0.739
CHMP3	0.519291	0.407336	0.684
HACD2	0.523935	0.40468	0.686
CMIP	0.526757	0.377575	0.706
SOS2	0.532243	0.386762	0.699
SERPINB9	0.539781	0.472508	0.637
CCL3/L1	0.540413	0.520052	0.603
SLC25A1	0.548641	0.367648	0.713
MAPK3	0.549026	0.432169	0.666
VHL	0.549926	0.477325	0.633
PML	0.550594	0.483344	0.629
ARID1B	0.553989	0.438651	0.661
CLOCK	0.558078	0.346372	0.729
SMAD4	0.558613	0.454277	0.65
CHMP2A	0.55919	0.447561	0.654
REST	0.560551	0.470065	0.638
IRF9	0.561278	0.494951	0.621
PTK2B	0.562286	0.506155	0.613
NAGLU	0.563348	0.342013	0.732
TYK2	0.570508	0.487409	0.626
IRF3	0.570721	0.440771	0.659
PIK3CA	0.576498	0.433169	0.665
SLC2A8	0.57748	0.401671	0.688
PFKL	0.581347	0.517629	0.605
ZNF136	0.581887	0.401543	0.688
NCOR1	0.593526	0.520897	0.602
IFIT2	0.59415	0.367679	0.713
CTSA	0.596931	0.482289	0.63
CARD11	0.59835	0.521277	0.602
CD3E	0.608616	0.594258	0.552
ACAP2	0.615498	0.50253	0.615
ARID1A	0.620898	0.51146	0.609
IL2RG	0.637009	0.632136	0.527
TRIM34	0.642402	0.423919	0.672
ALDH3A2	0.64424	0.50127	0.616
AHR	0.65573	0.575063	0.565
TRAF1	0.657854	0.587019	0.557
CTSS	0.660155	0.577722	0.563
BCL2A1	0.661331	0.423399	0.672
ZNF708	0.66764	0.470277	0.638
GSK3B	0.668535	0.537233	0.591
ATXN7	0.674344	0.564127	0.573
LPAR6	0.676005	0.569784	0.569
VPS28	0.677572	0.590927	0.555
KLRK1	0.678281	0.572589	0.567
MYD88	0.68307	0.598817	0.549
FLCN	0.687328	0.524139	0.6
KANSL1	0.688012	0.550165	0.582
CDK9	0.690631	0.549911	0.582
TOLLIP	0.694985	0.513509	0.608
MAP2K3	0.699989	0.584064	0.559
PPM1A	0.701092	0.5873	0.557
RUNX1	0.707198	0.585969	0.558
TRAT1	0.710834	0.640044	0.522
GNLY	0.722294	0.62054	0.535
PDK2	0.722843	0.507347	0.612
SLC16A7	0.725408	0.534464	0.593
CBL	0.73603	0.599765	0.549
ITK	0.747995	0.684788	0.493
PDK1	0.765246	0.541586	0.588
GABARAP	0.765591	0.710697	0.477
SERINC3	0.765944	0.667535	0.504
ATF7	0.770952	0.603863	0.546
IFNGR1	0.772227	0.596714	0.551
VAV1	0.773388	0.656249	0.512
BATF	0.790665	0.665761	0.506
SREBF2	0.801657	0.673193	0.501
RB1CC1	0.813694	0.604596	0.545
CD3D	0.817842	0.821717	0.411
CPT1A	0.824079	0.668085	0.504
ZNF91	0.824795	0.60896	0.543
ASH1L	0.826162	0.690068	0.49
STAT3	0.826483	0.735685	0.462
SOD2	0.826689	0.683399	0.494
CCR8	0.829485	0.616406	0.538
IL18BP	0.83261	0.549574	0.583
RICTOR	0.834959	0.641135	0.521
FAS	0.835887	0.707878	0.479
TNF	0.838225	0.743199	0.457
IDNK	0.838858	0.54558	0.585
ACSF3	0.843658	0.556132	0.578
SMURF1	0.84619	0.590529	0.555
AMPD3	0.847337	0.630466	0.528
KMT2A	0.849465	0.720307	0.471
MAP3K14	0.849696	0.669364	0.503
IL16	0.849879	0.787925	0.431
APC	0.850437	0.585491	0.558
MLYCD	0.852029	0.581555	0.561
PIK3C3	0.86125	0.683897	0.494
SLC27A3	0.862037	0.625379	0.532
HLA-C	0.862551	0.879052	0.379
PLCG1	0.869605	0.79642	0.426
ACAD10	0.870589	0.575372	0.565
CAT	0.872624	0.687172	0.492
NFKBIA	0.892921	0.872004	0.383
CD99	0.898772	0.823193	0.41
PRKCD	0.903787	0.677438	0.498
IMPDH1	0.903809	0.721771	0.47
PCCA	0.905347	0.610354	0.542
PPARA	0.912045	0.629113	0.529
GLYCTK	0.920917	0.620775	0.535
CXCR3	0.931423	0.852128	0.394
PRDM1	0.934959	0.779277	0.436
CD3G	0.939045	0.872216	0.383
EPC1	0.944411	0.756362	0.449
TNFRSF10B	0.948352	0.62931	0.529
CD9	0.95915	0.658731	0.51
STK3	0.961261	0.595588	0.551
KAT6A	0.963684	0.849067	0.396
PIK3CB	0.970636	0.632422	0.527
ATG7	0.972517	0.80337	0.422
SELL	0.972538	0.888683	0.374
STAT5B	0.972837	0.834704	0.404
CXCR6	0.978998	0.87074	0.384
SLC16A3	0.981466	0.816503	0.414
RRAGC	0.988228	0.753558	0.451
HDAC7	0.988665	0.791185	0.429
KMT2E	0.991303	0.839271	0.401
TET2	1.0105	0.794753	0.427
MR1	1.01878	0.674897	0.5
ARF5	1.02491	0.82724	0.408
TK2	1.02519	0.632555	0.527
TRAF6	1.02613	0.739583	0.46
PIK3C2A	1.03089	0.770379	0.441
BIRC3	1.03592	0.748663	0.454
SERINC1	1.04444	0.926054	0.354
IL10	1.04922	0.66101	0.509
FOXO1	1.0499	0.886951	0.375
TBX21	1.05542	0.859083	0.39
PTPN6	1.05772	0.938661	0.348
ID2	1.07126	1.02112	0.307
CXCR4	1.09657	1.05708	0.29
NCOA2	1.10019	0.862095	0.389
GZMM	1.10626	0.828355	0.407
OGDH	1.10977	0.997642	0.318
MTHFR	1.12078	0.762628	0.446
CIITA	1.12613	0.731117	0.465
RORA	1.13735	0.913614	0.361
MAML2	1.1617	0.867844	0.385
MAP1LC3B	1.16191	0.994601	0.32
TRIM22	1.16738	0.978057	0.328
ZAP70	1.18391	1.13135	0.258
TNFRSF9	1.19646	0.92087	0.357
COX19	1.1968	0.806575	0.42
IFNG	1.19778	1.12916	0.259
ATG14	1.20388	0.850548	0.395
CTNNA1	1.21519	0.972703	0.331
KRAS	1.2499	1.02123	0.307
SH3BP2	1.25572	1.00512	0.315
HLA-DRA	1.27303	1.22859	0.219
PRF1	1.27626	1.26583	0.206
DDIT4	1.28528	1.09535	0.273
NOTCH1	1.2891	1.08475	0.278
MAP3K12	1.29284	0.880663	0.379
LAT	1.30786	1.16697	0.243
PRKAG2	1.31518	0.981588	0.326
CTSD	1.3194	1.20145	0.23
ATF7IP	1.32136	1.16731	0.243
PTPRC	1.33693	1.30224	0.193
STAT6	1.34909	1.18809	0.235
FASLG	1.35615	1.01165	0.312
NKG7	1.36272	1.36453	0.172
PDP1	1.38719	0.992839	0.321
TBXAS1	1.39732	0.890261	0.373
TGFBR2	1.42887	1.15833	0.247
CD28	1.456	1.18682	0.235
CTSZ	1.45804	1.23052	0.219
RNASEL	1.46912	1.01998	0.308
CPT1B	1.48179	1.13822	0.255
PRR5	1.48918	1.07611	0.282
PLCB2	1.53136	1.27413	0.203
CTNND1	1.53242	0.96038	0.337
RDH10	1.5491	1.36763	0.171
H6PD	1.5653	1.13152	0.258
CASP8	1.599	1.48825	0.137
HERC1	1.64078	1.45304	0.146
CD4	1.67984	1.50247	0.133
ADORA2A	1.68312	1.3244	0.185
IRF5	1.70742	1.16512	0.244
NFATC1	1.72742	1.34607	0.178
TYMP	1.73846	1.43248	0.152
HLA-E	1.77787	1.76387	0.0778
CCL4/L1	1.80124	1.73017	0.0836
TRAF5	1.80989	1.55413	0.12
IL6ST	1.83215	1.56282	0.118
VSIR	1.84583	1.26415	0.206
CD27	1.84819	1.63955	0.101
IL21R	1.87292	1.521	0.128
AKT3	1.89727	1.56482	0.118
CD6	1.92924	1.67192	0.0945
OASL	1.93186	1.46796	0.142
CTLA4	1.94671	1.81662	0.0693
IL7R	1.95915	1.53812	0.124
CCL4	2.01561	1.97936	0.0478
CCR5	2.01571	1.67658	0.0936
CCL5	2.02607	1.98692	0.0469
PTGER4	2.05567	1.80252	0.0715
CD69	2.05799	1.88506	0.0594
EGR1	2.13593	1.55258	0.121
ITGB2	2.14324	2.09451	0.0362
TNFRSF18	2.15724	1.87909	0.0602
KLRC1/2	2.15835	1.68368	0.0922
LY96	2.20248	1.4874	0.137
SLC2A14	2.22627	2.09684	0.036
NR3C1	2.23688	1.95924	0.0501
LAG3	2.24644	2.06329	0.0391
TNFRSF4	2.26375	1.75734	0.0789
D2HGDH	2.3448	1.73159	0.0833
MAF	2.43722	2.19166	0.0284
CCR6	2.45566	1.49604	0.135
FYN	2.52456	2.36606	0.018
JUNB	2.57279	2.47172	0.0134
CD45R0	2.57662	2.56354	0.0104
HLA-DRB1	2.63469	2.50745	0.0122
TCF7	2.66479	2.17009	0.03
EOMES	2.68867	1.9009	0.0573
SLAMF6	2.93402	2.57938	0.0099
ACVR2A	2.94023	1.89206	0.0585
RORC	2.9453	1.82809	0.0675
BCL6	2.96836	2.07702	0.0378
ASS1	3.16173	1.99469	0.0461
ZNF43	3.16543	2.16603	0.0303
GZMH	3.2486	2.52944	0.0114
CD84	3.49786	3.15459	0.00161
IL7	3.56851	2.18963	0.0286
HMOX1	3.74209	2.68013	0.00736
NOD2	3.76148	2.6608	0.0078
KLRG1	3.9419	3.26253	0.0011
SIK1	4.02843	3.0808	0.00206
CD276	4.06791	2.65467	0.00794
TNFSF9	4.07715	2.91869	0.00352
COL6A3	4.07812	3.00583	0.00265
CD200	4.09329	2.98515	0.00283
JUN	4.10978	3.93686	8.26e-05
ITGB1	4.22757	4.03905	5.37e-05
TOX	4.39661	3.81321	0.000137
CX3CR1	4.53874	3.466	0.000528
IL21	4.88002	3.17457	0.0015
GZMK	5.00363	4.79017	1.67e-06
TP63	5.2023	3.38765	0.000705
DUSP1	5.38717	5.28325	1.27e-07
FOSB	5.42487	4.9717	6.64e-07
KLRB1	5.65151	4.85944	1.18e-06
TIGIT	5.81522	4.9249	8.44e-07
IL6R	6.04146	4.0324	5.52e-05
FOS	6.52673	6.43577	1.23e-10
PDCD1	6.68498	5.23573	1.64e-07
CXCL13	8.00392	6.37614	1.82e-10

## Sheet: 5B
gene	fc	z	pvalue2sided
IL5	-7.69709	-4.16764	3.08e-05
LIF	-7.08205	-5.05318	4.35e-07
IL2RA	-6.59327	-5.74627	9.12e-09
CYP1B1	-6.41773	-3.60127	0.000317
IL13	-6.00637	-4.27746	1.89e-05
CXCL8	-5.82328	-3.86809	0.00011
PTGER2	-5.72279	-4.00388	6.23e-05
IL3RA	-5.1895	-2.90811	0.00364
BATF3	-5.0539	-3.76851	0.000164
IL12RB2	-4.65756	-3.30038	0.000966
CISH	-4.43967	-3.5983	0.00032
IL17F	-4.31185	-2.41927	0.0156
IL4	-4.21106	-2.32825	0.0199
LAIR1	-3.95597	-2.73073	0.00632
FOXP3	-3.87505	-2.2826	0.0225
IL9	-3.68257	-2.11267	0.0346
CD38	-3.51834	-2.85569	0.00429
TNFRSF11A	-3.12772	-1.78994	0.0735
LTB	-3.09737	-3.55178	0.000383
PYCR1	-3.07263	-2.06118	0.0393
LTA	-3.07169	-2.85211	0.00434
HK2	-2.93722	-2.19322	0.0283
PDGFRB	-2.84413	-1.69812	0.0895
CCR7	-2.82573	-2.31123	0.0208
CCR2	-2.82369	-2.5126	0.012
CCNA1	-2.81468	-1.62136	0.105
MYB	-2.69288	-2.07186	0.0383
IL23A	-2.61569	-1.7591	0.0786
IL22	-2.53477	-1.5043	0.133
SOCS2	-2.47683	-1.86228	0.0626
CD68	-2.45709	-1.66976	0.095
USP18	-2.45072	-1.74034	0.0818
PTGDR2	-2.41663	-1.23925	0.215
ACTN1	-2.374	-1.78194	0.0748
CSF2	-2.31307	-2.10951	0.0349
SRM	-2.30094	-2.24681	0.0247
MAML3	-2.27693	-1.2626	0.207
NCR3	-2.20744	-1.83907	0.0659
PHGDH	-2.20329	-1.67438	0.0941
GZMB	-2.19606	-2.52634	0.0115
MT2A	-2.16381	-2.30038	0.0214
RRM2	-2.1256	-2.22976	0.0258
SLC7A11	-2.12057	-1.27691	0.202
UBE2T	-2.11662	-1.82895	0.0674
NDC1	-2.07768	-1.44147	0.149
EXO1	-2.07286	-1.58055	0.114
NME1	-2.05135	-1.96274	0.0497
XRCC2	-1.9968	-1.47354	0.141
IL26	-1.97872	-1.60186	0.109
IMPDH2	-1.86001	-1.7067	0.0879
CCR4	-1.84789	-1.79505	0.0726
EGFR	-1.84022	-2.12837	0.0333
MYC	-1.83848	-1.60713	0.108
ENO1	-1.82623	-1.99446	0.0461
STAT1	-1.80578	-1.97074	0.0488
SOS1	-1.75173	-1.72109	0.0852
PSAT1	-1.73101	-1.29697	0.195
CD40LG	-1.72393	-1.71779	0.0858
MX1	-1.72191	-1.67729	0.0935
IRF4	-1.70292	-1.68244	0.0925
PPAT	-1.69	-1.41809	0.156
GAD1	-1.6793	-0.958648	0.338
MYBL2	-1.67923	-1.57111	0.116
CTPS1	-1.66598	-1.51806	0.129
AFDN	-1.66091	-1.20451	0.228
CRLF2	-1.65336	-1.03902	0.299
TXN	-1.61508	-1.79626	0.0725
CDKN1A	-1.60458	-1.48046	0.139
RRM1	-1.60409	-1.40906	0.159
UPP1	-1.58932	-1.39537	0.163
CAD	-1.57189	-1.41182	0.158
OAS1	-1.55862	-1.34184	0.18
CCR8	-1.53942	-1.33704	0.181
GRPEL1	-1.5357	-1.12866	0.259
UCK2	-1.52181	-1.31326	0.189
TYMS	-1.50888	-1.51265	0.13
HSPE1	-1.50176	-1.6318	0.103
CLSPN	-1.49946	-1.33875	0.181
GRAP2	-1.49862	-1.32703	0.184
PSMA3	-1.47179	-1.49174	0.136
FH	-1.46656	-1.32548	0.185
PGD	-1.46644	-1.35414	0.176
EME1	-1.46223	-1.01672	0.309
PCLAF	-1.45505	-1.02818	0.304
TIMM23	-1.45333	-1.34218	0.18
NCAPH	-1.44441	-1.34342	0.179
IL4I1	-1.44327	-0.921293	0.357
FANCD2	-1.44256	-1.25561	0.209
AFMID	-1.43774	-0.984072	0.325
SLC16A1	-1.42422	-1.2591	0.208
MIF	-1.42418	-1.54671	0.122
FANCA	-1.41254	-1.22948	0.219
OAS3	-1.3991	-1.29369	0.196
NQO1	-1.39878	-1.04878	0.294
GART	-1.38286	-1.28404	0.199
CENPA	-1.37338	-1.13741	0.255
KIF2C	-1.37117	-1.17055	0.242
LEF1	-1.36522	-1.29113	0.197
IGF1R	-1.3566	-0.830764	0.406
RAD51	-1.35514	-1.09825	0.272
BCL2L1	-1.33914	-1.25396	0.21
RAD51AP1	-1.33567	-1.05362	0.292
BUB1	-1.32603	-1.19422	0.232
MTHFD1	-1.32456	-1.31355	0.189
RPTOR	-1.32088	-1.05864	0.29
GOT2	-1.31428	-1.20709	0.227
BRCA1	-1.31264	-1.01863	0.308
TIMELESS	-1.30535	-1.1495	0.25
BRIP1	-1.3053	-1.09059	0.275
IL4R	-1.30289	-1.27557	0.202
IDH3A	-1.30117	-1.17455	0.24
CDCA5	-1.29142	-1.14022	0.254
NDUFAB1	-1.28821	-1.31727	0.188
HJURP	-1.28036	-1.10354	0.27
SMC2	-1.27512	-1.22686	0.22
SGO2	-1.27246	-1.05336	0.292
NAA20	-1.26622	-1.13584	0.256
CCNA2	-1.22211	-1.19841	0.231
SCD	-1.21863	-1.06255	0.288
BCL2	-1.21421	-1.12842	0.259
PRIM1	-1.21203	-1.05216	0.293
TKT	-1.20988	-1.19198	0.233
NME2	-1.20458	-1.37433	0.169
SLC1A5	-1.17479	-1.06502	0.287
DTL	-1.17304	-0.876732	0.381
NCAPG2	-1.16937	-1.10791	0.268
TFDP1	-1.16881	-1.16385	0.244
FOXM1	-1.15444	-0.987469	0.323
FAH	-1.13704	-0.898674	0.369
TIMM17A	-1.1334	-1.0559	0.291
ITGA1	-1.13298	-0.922118	0.356
LDHB	-1.13166	-1.31353	0.189
FANCI	-1.12224	-1.03513	0.301
MAPK8	-1.12097	-0.921912	0.357
MDH2	-1.1209	-1.09639	0.273
CDC20	-1.12085	-1.07645	0.282
NPM1	-1.11939	-1.31918	0.187
PSMA6	-1.11792	-1.16551	0.244
CCNC	-1.11019	-1.02199	0.307
UBE2C	-1.10599	-1.06285	0.288
SLC7A5	-1.10518	-1.10271	0.27
PSMA2	-1.1038	-1.17076	0.242
IKZF4	-1.10258	-0.804062	0.421
IL12A	-1.09325	-0.709404	0.478
IFI6	-1.09255	-0.912663	0.361
LDHA	-1.09171	-1.24355	0.214
MTHFD1L	-1.09089	-0.981895	0.326
PRDX1	-1.09088	-1.2209	0.222
GARS	-1.0718	-1.04716	0.295
FNIP2	-1.04858	-0.7274	0.467
IKZF2	-1.04816	-0.846522	0.397
BUB1B	-1.04733	-0.902864	0.367
NEK2	-1.02968	-0.868267	0.385
GTSE1	-1.02922	-0.915619	0.36
TPX2	-1.01962	-0.894652	0.371
IFNGR2	-1.01714	-0.605197	0.545
PPIA	-1.01614	-1.20949	0.226
MKI67	-1.0096	-0.983656	0.325
CDCA8	-1.00689	-0.807929	0.419
TFAM	-0.997951	-0.900617	0.368
PLK1	-0.992126	-0.90566	0.365
GNG10	-0.990668	-0.807526	0.419
PYCR3	-0.990367	-0.667074	0.505
NUP205	-0.982358	-0.897722	0.369
SLC3A2	-0.972252	-0.948009	0.343
TXNRD1	-0.972224	-0.959994	0.337
GFM1	-0.963861	-0.882597	0.377
ADK	-0.961703	-0.890711	0.373
UQCRQ	-0.959794	-0.959321	0.337
ACAT2	-0.955618	-0.889405	0.374
IFI35	-0.953195	-0.799007	0.424
FDX1	-0.950294	-0.879152	0.379
GPX1	-0.942134	-0.796589	0.426
IFIT3	-0.938051	-0.570453	0.568
SDHB	-0.935187	-0.910186	0.363
SHMT2	-0.927456	-0.856751	0.392
RPIA	-0.926107	-0.888438	0.374
FKBP1A	-0.92382	-0.721354	0.471
NPRL3	-0.916825	-0.802922	0.422
PPT2	-0.916396	-0.610763	0.541
CD45RA	-0.913869	-0.670823	0.502
HSPA4	-0.911972	-0.85444	0.393
IFI30	-0.905199	-0.761378	0.446
MAT2A	-0.89421	-0.943447	0.345
TP53	-0.893824	-0.867382	0.386
CD7	-0.890936	-0.853094	0.394
PKM	-0.889534	-1.00889	0.313
CASP3	-0.88454	-0.890121	0.373
HADH	-0.884436	-0.757724	0.449
ALDOA	-0.879117	-1.00211	0.316
IFITM3	-0.871459	-0.700939	0.483
MSH2	-0.860332	-0.767265	0.443
MTHFD2	-0.859741	-0.836955	0.403
PSMA7	-0.854016	-0.933616	0.351
TFRC	-0.838922	-0.898732	0.369
TGFBR1	-0.835412	-0.764593	0.445
KPNA2	-0.834117	-0.846826	0.397
SHMT1	-0.831642	-0.665503	0.506
GPI	-0.829107	-0.869154	0.385
CDC26	-0.828191	-0.769668	0.441
ODC1	-0.820533	-0.792948	0.428
PSME2	-0.818786	-0.929002	0.353
ZNF254	-0.817647	-0.617058	0.537
COX7A2	-0.813472	-0.876974	0.381
PGK1	-0.8126	-0.924052	0.355
TALDO1	-0.805918	-0.80235	0.422
RPL3	-0.804759	-0.903634	0.366
AURKA	-0.799198	-0.628587	0.53
CEACAM1	-0.796704	-0.527719	0.598
NDUFA6	-0.795844	-0.819198	0.413
ZNF93	-0.795382	-0.524459	0.6
NDUFB9	-0.795302	-0.81322	0.416
STAM	-0.791774	-0.663438	0.507
RBX1	-0.788572	-0.831205	0.406
ADAL	-0.785276	-0.558261	0.577
CKAP5	-0.780475	-0.711533	0.477
PGAM1	-0.776254	-0.867191	0.386
MLST8	-0.776223	-0.652369	0.514
TK1	-0.776079	-0.667471	0.504
UBA5	-0.772558	-0.713882	0.475
ME2	-0.768435	-0.663666	0.507
CCNB2	-0.7646	-0.666139	0.505
POLE	-0.752588	-0.685408	0.493
SEC13	-0.751936	-0.720666	0.471
HSPA9	-0.745218	-0.701686	0.483
IL32	-0.740992	-0.883759	0.377
MYBL1	-0.738272	-0.484166	0.628
TOMM6	-0.719794	-0.637642	0.524
JAK2	-0.715642	-0.613227	0.54
GMPS	-0.706863	-0.620583	0.535
FASN	-0.706862	-0.669037	0.503
NDUFB4	-0.702783	-0.714186	0.475
UBE2I	-0.701366	-0.700209	0.484
ACAT1	-0.700974	-0.587058	0.557
PRIM2	-0.669803	-0.619436	0.536
COX6C	-0.669111	-0.742347	0.458
RAE1	-0.660172	-0.604157	0.546
GAPDH	-0.657825	-0.784588	0.433
PDHA1	-0.65196	-0.577827	0.563
COX6A1	-0.651315	-0.705867	0.48
ACAA2	-0.641694	-0.615854	0.538
COX5A	-0.634762	-0.686884	0.492
HMGCR	-0.63213	-0.544515	0.586
ATOX1	-0.630259	-0.546649	0.585
COX7B	-0.62969	-0.662288	0.508
PYCR2	-0.624494	-0.618534	0.536
NDUFA12	-0.624236	-0.629184	0.529
NMT1	-0.620671	-0.601076	0.548
CS	-0.618473	-0.619558	0.536
OXSM	-0.61785	-0.457179	0.648
ACACA	-0.617783	-0.424138	0.671
STAT4	-0.609489	-0.555212	0.579
OPA1	-0.606538	-0.571446	0.568
MTHFS	-0.606364	-0.52232	0.601
MTCP1	-0.606144	-0.398457	0.69
TECR	-0.599228	-0.579988	0.562
GCLC	-0.59776	-0.475044	0.635
TIMP1	-0.596234	-0.559057	0.576
ISG15	-0.596121	-0.561938	0.574
TRIM25	-0.585179	-0.551387	0.581
EZH2	-0.580578	-0.560786	0.575
UQCR10	-0.567505	-0.532624	0.594
LTA4H	-0.562893	-0.495846	0.62
NCAPD2	-0.559629	-0.563818	0.573
RPLP0	-0.559327	-0.66626	0.505
COX16	-0.553034	-0.459008	0.646
GPX4	-0.543336	-0.536403	0.592
PSMB1	-0.528181	-0.528362	0.597
TGIF2	-0.527774	-0.443437	0.657
LAMTOR5	-0.525671	-0.547168	0.584
MID1IP1	-0.511512	-0.451935	0.651
NUP62	-0.510851	-0.473176	0.636
VEGFA	-0.507349	-0.324864	0.745
SNF8	-0.503717	-0.496274	0.62
NDUFA4	-0.499598	-0.537416	0.591
COX5B	-0.495694	-0.529159	0.597
PARP1	-0.488437	-0.491191	0.623
CD247	-0.488199	-0.547986	0.584
TFB2M	-0.486656	-0.417021	0.677
NEDD8	-0.484667	-0.497318	0.619
PEMT	-0.477672	-0.375669	0.707
NFKB1	-0.473684	-0.430832	0.667
LAMTOR2	-0.464805	-0.435443	0.663
GOT1	-0.463641	-0.35419	0.723
UCK1	-0.457467	-0.37123	0.71
CTSW	-0.455662	-0.473855	0.636
OAT	-0.455248	-0.389192	0.697
GCDH	-0.453095	-0.363141	0.716
COX6B1	-0.450679	-0.489149	0.625
XAF1	-0.449811	-0.418461	0.676
IL10RA	-0.446706	-0.457302	0.647
TELO2	-0.445189	-0.364962	0.715
NSD2	-0.442094	-0.44339	0.657
OAS2	-0.433282	-0.434916	0.664
NFE2L2	-0.42706	-0.399916	0.689
MSRB2	-0.426224	-0.298024	0.766
PUDP	-0.424476	-0.301921	0.763
GATA3	-0.423527	-0.448756	0.654
COX7C	-0.422563	-0.439653	0.66
ASNS	-0.421238	-0.3447	0.73
WRN	-0.421236	-0.326891	0.744
DAP3	-0.421077	-0.417284	0.676
PGM2	-0.414967	-0.367691	0.713
SMARCA4	-0.412858	-0.396524	0.692
AP2S1	-0.412451	-0.409223	0.682
TXN2	-0.392944	-0.369372	0.712
BRCA2	-0.391129	-0.290588	0.771
LAMTOR1	-0.389161	-0.336017	0.737
ATP5PD	-0.380944	-0.381139	0.703
NDUFB8	-0.376037	-0.389031	0.697
SRR	-0.372513	-0.252304	0.801
NDUFA13	-0.365164	-0.399843	0.689
NDUFA7	-0.361181	-0.338285	0.735
GPS1	-0.360099	-0.344917	0.73
PFKP	-0.35265	-0.356324	0.722
PSMC1	-0.346122	-0.324719	0.745
CD8B	-0.343843	-0.320496	0.749
L2HGDH	-0.343423	-0.235162	0.814
ADAR	-0.337001	-0.373702	0.709
SLAMF7	-0.333167	-0.29602	0.767
PNP	-0.332115	-0.336557	0.736
KYAT1	-0.327624	-0.231823	0.817
NDUFS8	-0.327568	-0.316168	0.752
ATP5MG	-0.319761	-0.308268	0.758
SMAD5	-0.312484	-0.248004	0.804
MFN2	-0.312342	-0.279197	0.78
GFER	-0.311983	-0.231476	0.817
ATP6V1F	-0.311858	-0.319966	0.749
HSF2	-0.310107	-0.245479	0.806
KEAP1	-0.302995	-0.272342	0.785
RARG	-0.301205	-0.270612	0.787
IDH3B	-0.300763	-0.295709	0.767
NFATC2IP	-0.296378	-0.279719	0.78
PSMD13	-0.284591	-0.284519	0.776
UQCR11	-0.280725	-0.222219	0.824
BRCC3	-0.266952	-0.235808	0.814
CD274	-0.256968	-0.1778	0.859
FABP5	-0.252801	-0.275023	0.783
SMAD2	-0.252382	-0.243867	0.807
MAPK1	-0.247932	-0.25323	0.8
ATP5MF	-0.247213	-0.225234	0.822
ZNF85	-0.244487	-0.177206	0.859
APOM	-0.242282	-0.160207	0.873
SREBF1	-0.239987	-0.206692	0.836
ATF4	-0.238738	-0.268094	0.789
CBR4	-0.231772	-0.200042	0.841
IKBKE	-0.23051	-0.234834	0.814
KYAT3	-0.229368	-0.213676	0.831
ABL1	-0.227129	-0.179629	0.857
SKP1	-0.225338	-0.246163	0.806
PPP3CA	-0.222672	-0.180651	0.857
CD8A	-0.219295	-0.238874	0.811
NDUFB1	-0.212285	-0.219122	0.827
SOD1	-0.204328	-0.21626	0.829
PSMB10	-0.202643	-0.215937	0.829
ACADVL	-0.202639	-0.22002	0.826
PIK3R4	-0.201861	-0.168882	0.866
GBA	-0.201526	-0.173715	0.862
BAD	-0.200811	-0.169005	0.866
DVL2	-0.200687	-0.163027	0.87
PSPH	-0.19797	-0.134827	0.893
ADA	-0.196575	-0.181585	0.856
GZMA	-0.193459	-0.229272	0.819
NDUFS7	-0.188797	-0.174743	0.861
PPP2R5D	-0.186267	-0.172075	0.863
HK1	-0.182051	-0.187497	0.851
NDUFA3	-0.180559	-0.178801	0.858
RPL23	-0.175822	-0.208084	0.835
HEXB	-0.173214	-0.161058	0.872
UMPS	-0.172948	-0.124818	0.901
IFNAR1	-0.163234	-0.150666	0.88
ACSL5	-0.161872	-0.158315	0.874
MPC1	-0.160876	-0.135786	0.892
ITGAM	-0.157983	-0.131945	0.895
PECAM1	-0.155247	-0.157534	0.875
APRT	-0.151632	-0.156581	0.876
UBE2F	-0.146791	-0.140898	0.888
PSMB3	-0.146205	-0.154614	0.877
ATP5ME	-0.139757	-0.144925	0.885
ERAP2	-0.137923	-0.140763	0.888
CHMP6	-0.135278	-0.120517	0.904
CD9	-0.130806	-0.104998	0.916
CCL28	-0.129321	-0.0968632	0.923
FNIP1	-0.128457	-0.111028	0.912
HPRT1	-0.12815	-0.129711	0.897
NDUFA1	-0.126558	-0.138164	0.89
IRF8	-0.122812	-0.0751251	0.94
ACVR1B	-0.11662	-0.0850023	0.932
CALM1	-0.114825	-0.112081	0.911
NOTCH2	-0.112872	-0.107536	0.914
NDUFB7	-0.112525	-0.111054	0.912
PTCD1	-0.11061	-0.0790092	0.937
NFS1	-0.104797	-0.0898378	0.928
SEC22B	-0.104224	-0.0951859	0.924
PRDX5	-0.103462	-0.102592	0.918
PEBP1	-0.100556	-0.0985305	0.922
BID	-0.096822	-0.0725557	0.942
SERINC5	-0.096764	-0.0918231	0.927
AMPD2	-0.0920317	-0.0794583	0.937
DGUOK	-0.0916519	-0.0919105	0.927
NRAS	-0.0906345	-0.0851824	0.932
IDH2	-0.0840064	-0.088438	0.93
LAMP2	-0.0821666	-0.0810607	0.935
MAP2K1	-0.0817849	-0.0790083	0.937
WASHC4	-0.0755767	-0.0672041	0.946
TICAM1	-0.0748796	-0.0671159	0.946
GMPR2	-0.0703532	-0.0643091	0.949
MAP3K7	-0.0631619	-0.0592377	0.953
CAB39	-0.0589361	-0.0609749	0.951
ATP5F1D	-0.0577674	-0.0565996	0.955
NDUFA2	-0.0568826	-0.0471809	0.962
DERA	-0.049408	-0.0403448	0.968
SELL	-0.0467439	-0.0499223	0.96
DCK	-0.0408296	-0.0417876	0.967
MGST3	-0.0380447	-0.0371278	0.97
RBBP5	-0.037445	-0.0325459	0.974
RDH14	-0.0368828	-0.0303816	0.976
PFKM	-0.0368059	-0.0281116	0.978
HDAC8	-0.0361396	-0.0317278	0.975
CXCL10	-0.0359054	-0.0252011	0.98
MTOR	-0.0356627	-0.0321544	0.974
MAGED1	-0.0281151	-0.0245421	0.98
SLC25A6	-0.0246658	-0.027316	0.978
GLRX	-0.0233918	-0.0236794	0.981
NDUFB2	-0.0212855	-0.0223671	0.982
HSF1	-0.010063	-0.00987768	0.992
IDH1	-0.00410808	-0.00338457	0.997
SDHC	0.0025511	0.00241337	0.998
NT5E	0.00358144	0.0023502	0.998
ICOS	0.00380608	0.00367175	0.997
ATG101	0.00957553	0.00822495	0.993
PCK2	0.0148307	0.0129555	0.99
CHMP4A	0.0157674	0.0164494	0.987
DHFR2	0.0164487	0.0125705	0.99
ECHS1	0.0193226	0.0155598	0.988
SH2D1A	0.0211557	0.022219	0.982
COX8A	0.0268476	0.029439	0.977
DHRS4	0.0277642	0.0246644	0.98
PPARG	0.0448413	0.0380708	0.97
SELENOK	0.0485634	0.032748	0.974
CTCF	0.0586781	0.057847	0.954
GRK2	0.0587235	0.0634172	0.949
GUSB	0.0595003	0.0578134	0.954
AKT2	0.0617576	0.0615778	0.951
NFKB2	0.0635903	0.0644098	0.949
AKT1S1	0.0646892	0.0518835	0.959
COPS6	0.0653968	0.066715	0.947
SELPLG	0.0654675	0.0528459	0.958
BTBD6	0.0659784	0.0565949	0.955
USP15	0.0703878	0.0696516	0.944
RPS6KB2	0.0712523	0.062365	0.95
ACOT2	0.072205	0.0608789	0.951
SP100	0.0724229	0.0757569	0.94
ZNF682	0.0735246	0.0517436	0.959
OMA1	0.074155	0.0628981	0.95
ACOX1	0.0748425	0.0657133	0.948
DGLUCY	0.0814208	0.0722596	0.942
NDUFB11	0.0876283	0.0865104	0.931
SMAD3	0.0953139	0.0951594	0.924
PRKAB1	0.0991741	0.0858673	0.932
GLUL	0.100507	0.0978531	0.922
TNFSF13B	0.106513	0.0729038	0.942
ICAM1	0.106842	0.0927305	0.926
IDH3G	0.111943	0.105288	0.916
PIK3CD	0.121436	0.131892	0.895
ARAF	0.124085	0.10505	0.916
COX4I1	0.124724	0.13524	0.892
AKT1	0.124791	0.12295	0.902
NADK	0.124833	0.113838	0.909
ACSF2	0.129938	0.0872492	0.93
WAS	0.130142	0.136266	0.892
CCR6	0.136145	0.096941	0.923
ADD1	0.136301	0.13843	0.89
MAPK3	0.138647	0.127556	0.899
SOCS4	0.139928	0.127004	0.899
NDUFB10	0.140681	0.139417	0.889
DIABLO	0.143116	0.1387	0.89
YWHAZ	0.146298	0.171018	0.864
SLC2A1	0.147567	0.119133	0.905
RELA	0.151008	0.144952	0.885
MAPKAP1	0.153184	0.143605	0.886
MAP2K2	0.154523	0.151746	0.879
PRPS1	0.165124	0.13878	0.89
PRKAG1	0.168423	0.149613	0.881
UCKL1	0.171554	0.167465	0.867
GLUD1	0.172603	0.180539	0.857
TPR	0.180784	0.168921	0.866
HAVCR2	0.183683	0.181496	0.856
ZNF253	0.183996	0.143524	0.886
PDCD1LG2	0.188056	0.129567	0.897
TRAF3	0.190483	0.18672	0.852
GAPVD1	0.19673	0.187663	0.851
AMPD3	0.199242	0.173267	0.862
FAHD1	0.19933	0.158725	0.874
FDXR	0.203884	0.13951	0.889
HADHB	0.204548	0.199132	0.842
PDK3	0.205747	0.172484	0.863
CTNNB1	0.20828	0.223282	0.823
PIK3R1	0.213474	0.198769	0.842
PIDD1	0.218894	0.173386	0.862
ARPC4	0.223291	0.25951	0.795
MCAT	0.23039	0.160929	0.872
UBE2V1	0.233545	0.254793	0.799
CCL1	0.236972	0.210063	0.834
TIGAR	0.237615	0.178432	0.858
IRF9	0.240289	0.247655	0.804
COX14	0.243877	0.239804	0.81
ZNF675	0.247428	0.188696	0.85
STAM2	0.248271	0.200368	0.841
MAX	0.248612	0.257723	0.797
PTK2B	0.249546	0.262546	0.793
DOCK2	0.251107	0.2711	0.786
IRF7	0.254604	0.242312	0.809
RANBP2	0.256888	0.239967	0.81
MPC2	0.259454	0.246341	0.805
SERPINB9	0.261963	0.268015	0.789
ARID2	0.264487	0.258072	0.796
HACD4	0.268777	0.253847	0.8
NADK2	0.277522	0.211926	0.832
SLC25A20	0.279108	0.268338	0.788
SREBF2	0.285957	0.28066	0.779
KDM3B	0.29024	0.266938	0.79
RPS6KB1	0.300436	0.282848	0.777
SQSTM1	0.304265	0.30489	0.76
PML	0.304358	0.312276	0.755
IFNGR1	0.304612	0.275104	0.783
CDC42	0.30834	0.348251	0.728
PIK3CB	0.312525	0.237993	0.812
CREB1	0.313095	0.311637	0.755
CARD11	0.315473	0.321222	0.748
NFAT5	0.316741	0.26459	0.791
STAT5A	0.318643	0.295256	0.768
GLUD1/2	0.324014	0.339548	0.734
TBK1	0.324202	0.29632	0.767
PRKCD	0.328557	0.287835	0.773
MTF1	0.33435	0.282772	0.777
CD96	0.334544	0.347005	0.729
CLOCK	0.33944	0.24623	0.806
IRF1	0.342149	0.364383	0.716
LAMTOR4	0.342867	0.357387	0.721
HRAS	0.343108	0.269666	0.787
NBL1	0.34669	0.2637	0.792
RAC2	0.347264	0.402282	0.687
ATG7	0.347423	0.335433	0.737
PIK3R2	0.363637	0.283607	0.777
GNS	0.365074	0.301454	0.763
CXCR3	0.371328	0.39705	0.691
PLA2G15	0.371581	0.271206	0.786
PRICKLE3	0.373358	0.28944	0.772
ZNF100	0.375556	0.288034	0.773
IL2RB	0.375953	0.4118	0.68
STAT2	0.3776	0.309411	0.757
SLC16A13	0.379865	0.284766	0.776
GLS	0.387733	0.417786	0.676
TRIM33	0.390356	0.379899	0.704
ALDOC	0.391226	0.340926	0.733
HACD2	0.399158	0.360337	0.719
HLA-A	0.401172	0.478435	0.632
ERN1	0.40389	0.381829	0.703
RUNX3	0.411039	0.418483	0.676
LPAR6	0.414281	0.408117	0.683
PDPK1	0.417724	0.370081	0.711
MYD88	0.419594	0.42992	0.667
LAMP1	0.422337	0.454058	0.65
TGFB1	0.424104	0.45661	0.648
SLC16A7	0.429954	0.370244	0.711
STK11	0.430565	0.420974	0.674
IRF3	0.431159	0.389185	0.697
NRF1	0.43225	0.329565	0.742
PRKAA1	0.435434	0.431566	0.666
EEA1	0.435505	0.373573	0.709
DECR1	0.435635	0.438206	0.661
NEU1	0.439415	0.3814	0.703
ASL	0.440016	0.378128	0.705
PLCG1	0.443115	0.474314	0.635
GNAI2	0.443871	0.513874	0.607
HEXA	0.451273	0.428069	0.669
CD63	0.46061	0.492831	0.622
MAP2K7	0.461222	0.42515	0.671
CHMP2A	0.462114	0.432286	0.666
KLRK1	0.462985	0.456803	0.648
TRAT1	0.465613	0.49	0.624
PRKAB2	0.469217	0.384163	0.701
SOD2	0.470636	0.454723	0.649
PRKCB	0.47527	0.477698	0.633
HSD17B8	0.47769	0.360844	0.718
IL2RG	0.479495	0.556133	0.578
ERCC6	0.48154	0.343765	0.731
NSD1	0.482391	0.47344	0.636
RUNX1	0.49638	0.480703	0.631
TRAF1	0.504278	0.525923	0.599
BRAF	0.508772	0.456288	0.648
PTEN	0.508853	0.538192	0.59
SLC25A1	0.509664	0.39917	0.69
ZNF708	0.515185	0.424134	0.671
AK3	0.515243	0.470612	0.638
TYK2	0.523679	0.522909	0.601
SLC16A6	0.525933	0.402371	0.687
VHL	0.528325	0.53597	0.592
LCK	0.530035	0.590709	0.555
TRIM26	0.532458	0.509938	0.61
ITCH	0.535742	0.532736	0.594
CTSA	0.541234	0.51109	0.609
SOCS5	0.548221	0.429009	0.668
JAK1	0.550317	0.591297	0.554
TSC2	0.551582	0.484315	0.628
SLC2A11	0.55317	0.38938	0.697
USP8	0.55531	0.515162	0.606
CHMP3	0.558547	0.512072	0.609
BCL2A1	0.56149	0.420149	0.674
VAV1	0.565242	0.560576	0.575
TNF	0.575568	0.596446	0.551
ATG2B	0.576449	0.521108	0.602
ACAP2	0.580898	0.554325	0.579
SOS2	0.592101	0.502873	0.615
IL12RB1	0.600419	0.594464	0.552
NAGLU	0.604086	0.428642	0.668
REST	0.613394	0.60119	0.548
HIF1A	0.622812	0.67527	0.5
RPS6KA1	0.628052	0.642735	0.52
CD80	0.630702	0.510743	0.61
ITK	0.631083	0.675263	0.5
FOXO1	0.632634	0.624648	0.532
CTSS	0.637155	0.6517	0.515
IDNK	0.639874	0.486401	0.627
TOLLIP	0.641702	0.554161	0.579
KMT2D	0.646032	0.616484	0.538
WDR45	0.647613	0.532576	0.594
ACAD10	0.64903	0.501337	0.616
IMPDH1	0.649037	0.605789	0.545
GADD45B	0.660512	0.603376	0.546
PIK3C3	0.669962	0.621787	0.534
PFKL	0.67232	0.699663	0.484
THBS1	0.672599	0.431258	0.666
ZNF91	0.676593	0.583847	0.559
ZNF136	0.686359	0.553571	0.58
PDK2	0.691171	0.56699	0.571
BATF	0.695403	0.68437	0.494
NFIL3	0.699707	0.606657	0.544
FLCN	0.70133	0.625078	0.532
CBL	0.70196	0.66854	0.504
ARID1A	0.707894	0.681536	0.496
CD3E	0.712923	0.813586	0.416
TAOK2	0.719444	0.63479	0.526
ALDH3A2	0.726626	0.66079	0.509
IL18BP	0.72911	0.562479	0.574
NCOR1	0.737324	0.756311	0.449
SLC16A3	0.747492	0.726805	0.467
PPARA	0.757634	0.610803	0.541
TRIM34	0.758665	0.585135	0.558
STAT5B	0.758919	0.761057	0.447
PIK3CA	0.765429	0.672193	0.501
MAP3K14	0.776527	0.714965	0.475
STAT3	0.77866	0.810093	0.418
SERINC3	0.790134	0.804835	0.421
HLA-C	0.792461	0.943924	0.345
SMAD4	0.79564	0.756234	0.45
IL16	0.805987	0.873343	0.382
APC	0.820381	0.66012	0.509
MTHFR	0.82056	0.652577	0.514
AHR	0.828196	0.848893	0.396
VPS28	0.828669	0.844673	0.398
PPM1A	0.865625	0.847508	0.397
PDK1	0.866655	0.716872	0.473
RAI1	0.866731	0.658222	0.51
SMURF1	0.873622	0.712568	0.476
CIITA	0.876278	0.664924	0.506
LAT	0.886061	0.924044	0.355
FAS	0.903422	0.894192	0.371
TNFRSF10B	0.904261	0.701323	0.483
ATF7	0.910983	0.83397	0.404
ARID1B	0.911209	0.843268	0.399
ATXN7	0.913449	0.893118	0.372
XCL1/2	0.917775	0.813409	0.416
CPT1A	0.919842	0.871576	0.383
IFIT2	0.920003	0.665413	0.506
GSK3B	0.927132	0.870781	0.384
CAT	0.961925	0.885338	0.376
KRAS	0.969072	0.925409	0.355
RRAGC	0.972619	0.866826	0.386
KAT6A	0.973246	1.00221	0.316
TRAF6	0.980376	0.82586	0.409
CD99	0.981041	1.05019	0.294
KANSL1	0.987863	0.923258	0.356
STAT6	0.99083	1.01985	0.308
TRIM22	0.993668	0.973024	0.331
MAP2K3	0.996185	0.97149	0.331
RB1CC1	0.998136	0.866808	0.386
MAML2	1.01144	0.883115	0.377
ASH1L	1.01595	0.991807	0.321
ENTPD1	1.01816	1.05881	0.29
GLYCTK	1.02473	0.80733	0.419
COX19	1.03153	0.812521	0.416
KMT2A	1.03276	1.02353	0.306
OGDH	1.03777	1.09037	0.276
ATG14	1.03858	0.8576	0.391
CD28	1.04364	0.994269	0.32
TBX21	1.04616	0.995265	0.32
RICTOR	1.04679	0.939446	0.348
SERINC1	1.05683	1.09519	0.273
CD3D	1.05899	1.24358	0.214
BIRC3	1.07386	0.907068	0.364
ACSF3	1.07613	0.829101	0.407
ARF5	1.10204	1.03961	0.299
NFKBIA	1.10228	1.25814	0.208
GABARAP	1.11709	1.212	0.226
CDK9	1.12767	1.04944	0.294
CD3G	1.12822	1.22479	0.221
MAP3K12	1.12984	0.89952	0.368
KMT2E	1.13413	1.12224	0.262
CD86	1.14079	0.801608	0.423
CPT1B	1.14601	1.02887	0.304
SH3BP2	1.14923	1.07513	0.282
PCCA	1.15857	0.912888	0.361
EPC1	1.16507	1.09056	0.275
LY96	1.16629	0.920554	0.357
NCOA2	1.17781	1.07868	0.281
MLYCD	1.18273	0.943522	0.345
NOTCH1	1.19152	1.17186	0.241
TK2	1.19199	0.859599	0.39
GZMM	1.20132	1.05135	0.293
TET2	1.20819	1.1106	0.267
SLC27A3	1.24068	1.05197	0.293
CXCR4	1.24558	1.40337	0.161
MR1	1.25019	0.96797	0.333
TYMP	1.26891	1.22204	0.222
PRDM1	1.27482	1.24187	0.214
GNLY	1.27542	1.28068	0.2
STK3	1.28379	0.929667	0.353
CTNNA1	1.28606	1.20317	0.229
MAP1LC3B	1.28754	1.28815	0.198
CTNND1	1.28982	0.94476	0.345
CMIP	1.30135	1.09023	0.276
PTPN6	1.30294	1.35143	0.177
TGFBR2	1.33154	1.2616	0.207
ZAP70	1.35534	1.51376	0.13
IL10	1.36106	1.00219	0.316
RORA	1.37487	1.2908	0.197
PIK3C2A	1.38074	1.20597	0.228
CTSZ	1.39377	1.3748	0.169
CCL3/L1	1.40948	1.58529	0.113
ID2	1.41047	1.57135	0.116
RORC	1.42155	1.03124	0.302
HDAC7	1.45088	1.35703	0.175
PLCB2	1.45685	1.4167	0.157
PTPRC	1.47891	1.68366	0.0922
ATF7IP	1.47936	1.52746	0.127
NFATC1	1.51423	1.37908	0.168
HLA-DRA	1.51482	1.70868	0.0875
IL7R	1.52662	1.40083	0.161
PRKAG2	1.54414	1.34698	0.178
IL6ST	1.5861	1.58127	0.114
CASP8	1.58829	1.72777	0.084
NKG7	1.59306	1.86439	0.0623
SLC2A8	1.59986	1.30061	0.193
CTSD	1.60262	1.70564	0.0881
CD4	1.62183	1.69541	0.09
PRR5	1.65075	1.3942	0.163
TCF7	1.65928	1.57929	0.114
FASLG	1.67007	1.45609	0.145
H6PD	1.67172	1.4124	0.158
PDP1	1.67592	1.40192	0.161
RNASEL	1.70595	1.3843	0.166
AKT3	1.71123	1.64958	0.099
IRF5	1.72843	1.37852	0.168
IFNG	1.74047	1.91767	0.0552
HLA-E	1.77778	2.06146	0.0393
TRAF5	1.80619	1.81271	0.0699
ADORA2A	1.80749	1.6623	0.0965
IL21R	1.81822	1.72578	0.0844
PRF1	1.81856	2.10811	0.035
CD27	1.85795	1.92638	0.0541
CCR5	1.87467	1.82243	0.0684
ACVR2A	1.88957	1.42117	0.155
PTGER4	1.89313	1.94015	0.0524
CXCR6	1.89865	1.9737	0.0484
DDIT4	1.9465	1.93883	0.0525
OASL	1.97236	1.75168	0.0798
HERC1	1.9895	2.05921	0.0395
ITGB2	2.00298	2.28779	0.0221
VSIR	2.00679	1.60634	0.108
CD6	2.01291	2.03884	0.0415
KLRC1/2	2.1125	1.92603	0.0541
NR3C1	2.15934	2.21052	0.0271
CTLA4	2.1733	2.37035	0.0178
ZBTB16	2.20138	1.54066	0.123
SLC2A14	2.26141	2.48942	0.0128
EGR1	2.26264	1.92226	0.0546
CCL5	2.34243	2.68485	0.00726
CCL4/L1	2.38823	2.68115	0.00734
TBXAS1	2.41535	1.79858	0.0721
BCL6	2.42138	1.98023	0.0477
CCL4	2.49622	2.86504	0.00417
CD69	2.50886	2.68588	0.00723
HLA-DRB1	2.57416	2.86331	0.00419
LAG3	2.57422	2.76338	0.00572
CD45R0	2.58886	3.01043	0.00261
MAF	2.59146	2.72366	0.00646
D2HGDH	2.59479	2.2396	0.0251
TNFRSF4	2.61133	2.36929	0.0178
RDH10	2.62312	2.70667	0.0068
TNFRSF9	2.64104	2.37578	0.0175
EOMES	2.66654	2.20343	0.0276
TNFRSF18	2.72794	2.77725	0.00548
JUNB	2.76551	3.10527	0.0019
SLAMF6	2.93418	3.01486	0.00257
ASS1	3.04655	2.24641	0.0247
FYN	3.11679	3.4141	0.00064
GZMH	3.17634	2.89058	0.00385
KLRG1	3.52302	3.40795	0.000655
CD276	3.53866	2.69903	0.00695
IL7	3.54982	2.54577	0.0109
CD84	3.60692	3.80194	0.000144
NOD2	3.67123	3.03525	0.0024
HMOX1	3.92026	3.28159	0.00103
CD200	4.07998	3.47761	0.000506
ITGB1	4.19705	4.68664	2.78e-06
JUN	4.25537	4.76429	1.9e-06
ZNF43	4.27144	3.41613	0.000635
COL6A3	4.29875	3.70319	0.000213
GZMK	4.38017	4.90101	9.53e-07
IL21	4.59169	3.49112	0.000481
TOX	4.79775	4.8634	1.15e-06
SIK1	4.83196	4.31896	1.57e-05
TNFSF9	4.93318	4.12751	3.67e-05
CX3CR1	4.96149	4.42827	9.5e-06
TP63	5.18609	3.94705	7.91e-05
KLRB1	5.2717	5.29788	1.17e-07
IL6R	5.56536	4.34154	1.41e-05
DUSP1	5.736	6.57475	4.87e-11
FOSB	5.82214	6.23631	4.48e-10
TIGIT	6.27643	6.2126	5.21e-10
FOS	6.83585	7.87819	3.32e-15
PDCD1	7.23375	6.62172	3.55e-11
CXCL13	9.29643	8.65566	4.9e-18

## Sheet: 5C
gene	fc	z	pvalue2sided
CCR8	-2.3689	-1.76037	0.0783
CCR6	-2.31952	-1.4131	0.158
IL26	-1.96615	-1.36184	0.173
CCR4	-1.93569	-1.60881	0.108
IL2RA	-1.7816	-1.32851	0.184
CCR7	-1.5983	-1.11852	0.263
RORC	-1.52375	-0.945763	0.344
LTB	-1.39334	-1.36704	0.172
CD9	-1.08996	-0.748567	0.454
ACVR2A	-1.05066	-0.676108	0.499
LY96	-1.0362	-0.699772	0.484
SELL	-1.01928	-0.931397	0.352
TCF7	-1.00552	-0.818849	0.413
LEF1	-0.999983	-0.809154	0.418
CCR2	-0.996438	-0.758627	0.448
CISH	-0.875357	-0.60702	0.544
TIMP1	-0.81733	-0.655704	0.512
LTA	-0.795475	-0.631955	0.527
UPP1	-0.746914	-0.561073	0.575
CD40LG	-0.666774	-0.568462	0.57
CSF2	-0.653701	-0.510085	0.61
TXN	-0.648966	-0.617544	0.537
AMPD3	-0.648094	-0.482219	0.63
NCR3	-0.643045	-0.458376	0.647
ATG7	-0.625094	-0.516373	0.606
GZMK	-0.623463	-0.596866	0.551
GRAP2	-0.598905	-0.453752	0.65
BCL2L1	-0.596437	-0.477853	0.633
STAT1	-0.587902	-0.548959	0.583
OAS3	-0.576014	-0.455707	0.649
PRKCD	-0.57523	-0.431166	0.666
CXCR3	-0.560094	-0.512412	0.608
BCL6	-0.546978	-0.382732	0.702
MYC	-0.543876	-0.406783	0.684
EGFR	-0.532227	-0.526676	0.598
CD276	-0.529245	-0.345378	0.73
ASNS	-0.523345	-0.366414	0.714
SREBF2	-0.5157	-0.43306	0.665
RARG	-0.484276	-0.372262	0.71
IL6R	-0.476098	-0.317774	0.751
PECAM1	-0.469961	-0.408024	0.683
TYMP	-0.46955	-0.386906	0.699
IFNGR1	-0.467615	-0.361335	0.718
IFI35	-0.461912	-0.331283	0.74
XAF1	-0.450012	-0.358195	0.72
APRT	-0.446448	-0.394448	0.693
BAD	-0.439437	-0.316432	0.752
GLRX	-0.43701	-0.378502	0.705
IL7R	-0.432528	-0.339577	0.734
SMAD5	-0.429485	-0.291642	0.771
PLCG1	-0.42649	-0.390597	0.696
LAT	-0.421798	-0.376361	0.707
KLRG1	-0.418886	-0.346692	0.729
SCD	-0.418025	-0.311855	0.755
FOXO1	-0.417262	-0.352503	0.724
MAPK1	-0.416571	-0.364035	0.716
CD28	-0.412361	-0.336126	0.737
MAPK3	-0.410379	-0.323032	0.747
PSME2	-0.388044	-0.376702	0.706
KLRB1	-0.379808	-0.326578	0.744
IMPDH2	-0.378944	-0.297501	0.766
MGST3	-0.376968	-0.314761	0.753
SRM	-0.366131	-0.305891	0.76
GPX1	-0.36101	-0.261163	0.794
MX1	-0.360086	-0.300105	0.764
STAT6	-0.358261	-0.315507	0.752
SOD2	-0.356053	-0.294339	0.768
GOT2	-0.349601	-0.274722	0.784
CAD	-0.347873	-0.267332	0.789
ADA	-0.336846	-0.266229	0.79
CPT1B	-0.335775	-0.257923	0.796
NDUFB2	-0.325552	-0.292695	0.77
NDUFA12	-0.322759	-0.278341	0.781
HMGCR	-0.32162	-0.237038	0.813
IRF9	-0.320989	-0.283057	0.777
SP100	-0.320553	-0.286891	0.774
AP2S1	-0.317277	-0.269337	0.788
PTK2B	-0.312741	-0.281521	0.778
ATP5ME	-0.304428	-0.2701	0.787
NFATC2IP	-0.301143	-0.243176	0.808
MTHFR	-0.30022	-0.204283	0.838
SLC16A7	-0.295454	-0.217684	0.828
IL21	-0.28833	-0.187566	0.851
NPRL3	-0.283006	-0.212057	0.832
NDUFB8	-0.282918	-0.25043	0.802
CARD11	-0.282877	-0.24644	0.805
KRAS	-0.28083	-0.229452	0.819
SERPINB9	-0.277819	-0.243194	0.808
PGK1	-0.272034	-0.264676	0.791
DIABLO	-0.267654	-0.221939	0.824
MYD88	-0.263476	-0.230977	0.817
TNF	-0.262657	-0.23288	0.816
LPAR6	-0.261724	-0.220599	0.825
PSMA7	-0.258884	-0.242146	0.809
IDH3B	-0.258635	-0.217569	0.828
GART	-0.258421	-0.205306	0.837
IMPDH1	-0.254772	-0.203458	0.839
CBR4	-0.254113	-0.187654	0.851
RPS6KB2	-0.253235	-0.189643	0.85
CIITA	-0.249847	-0.162209	0.871
OAS1	-0.248928	-0.18336	0.855
IDH2	-0.247718	-0.223128	0.823
MTHFS	-0.247192	-0.182183	0.855
UCK2	-0.246421	-0.181944	0.856
PML	-0.246237	-0.216161	0.829
IL6ST	-0.246051	-0.20988	0.834
TRAT1	-0.245221	-0.2208	0.825
LAMTOR2	-0.239252	-0.191773	0.848
SLC16A3	-0.233974	-0.194648	0.846
GCDH	-0.233403	-0.160053	0.873
LAMTOR5	-0.232609	-0.207159	0.836
PKM	-0.231638	-0.224782	0.822
USP15	-0.223365	-0.189112	0.85
ACAD10	-0.221558	-0.146428	0.884
SEC13	-0.219919	-0.180338	0.857
ACOX1	-0.217282	-0.163229	0.87
LDHB	-0.215926	-0.214436	0.83
KLRK1	-0.215296	-0.181748	0.856
STAT5B	-0.213918	-0.183544	0.854
NFATC1	-0.21319	-0.166125	0.868
JAK2	-0.212848	-0.156051	0.876
RUNX1	-0.210818	-0.174679	0.861
IRF7	-0.210307	-0.171252	0.864
TRIM25	-0.20942	-0.168833	0.866
VAV1	-0.208146	-0.17662	0.86
TKT	-0.204854	-0.17268	0.863
PEBP1	-0.204658	-0.171578	0.864
SLAMF7	-0.204232	-0.155258	0.877
GPS1	-0.200567	-0.164371	0.869
ACAT2	-0.197391	-0.157186	0.875
GFM1	-0.196029	-0.153582	0.878
SMARCA4	-0.195352	-0.160531	0.872
IKBKE	-0.194648	-0.169665	0.865
PIK3C3	-0.191287	-0.151896	0.879
FAHD1	-0.191082	-0.130186	0.896
MDH2	-0.189302	-0.158424	0.874
AKT3	-0.186035	-0.153436	0.878
LAMP2	-0.184834	-0.156015	0.876
STAM	-0.184135	-0.13201	0.895
HDAC8	-0.183934	-0.138162	0.89
PDHA1	-0.183161	-0.138893	0.89
NME2	-0.180179	-0.175885	0.86
NDUFA3	-0.178924	-0.151598	0.88
MTOR	-0.177905	-0.137241	0.891
MPC1	-0.175082	-0.126437	0.899
DAP3	-0.174268	-0.14776	0.883
TRIM22	-0.17371	-0.145539	0.884
NFKB1	-0.172408	-0.134167	0.893
KYAT3	-0.172383	-0.137401	0.891
LAMTOR4	-0.171152	-0.152639	0.879
GARS	-0.167323	-0.13987	0.889
GMPR2	-0.165734	-0.129619	0.897
ATG14	-0.165301	-0.116786	0.907
COX19	-0.16527	-0.111383	0.911
MAP3K12	-0.163002	-0.111034	0.912
PTGER4	-0.162541	-0.142524	0.887
SH2D1A	-0.162294	-0.145838	0.884
SERINC5	-0.161878	-0.131431	0.895
COX6A1	-0.160865	-0.149164	0.881
IL2RG	-0.157514	-0.156309	0.876
ADAR	-0.155622	-0.147651	0.883
MIF	-0.155362	-0.144364	0.885
PPARA	-0.154411	-0.10651	0.915
TRAF1	-0.153576	-0.13704	0.891
ZNF708	-0.152456	-0.107388	0.914
COX14	-0.152423	-0.128235	0.898
MAML2	-0.15026	-0.112252	0.911
IDH1	-0.148566	-0.104726	0.917
ZNF91	-0.148202	-0.10942	0.913
NDUFS7	-0.144727	-0.11461	0.909
RPL3	-0.14464	-0.138959	0.889
DOCK2	-0.141629	-0.130825	0.896
CCR5	-0.141036	-0.117308	0.907
ITGB2	-0.140267	-0.137078	0.891
NDUFA7	-0.140132	-0.112297	0.911
PPARG	-0.139798	-0.101551	0.919
IRF3	-0.139562	-0.107785	0.914
NDUFA13	-0.138784	-0.13002	0.897
AMPD2	-0.13793	-0.10189	0.919
NDUFB4	-0.136176	-0.118403	0.906
IFI30	-0.13567	-0.097636	0.922
TFAM	-0.130855	-0.10104	0.92
RBX1	-0.130845	-0.118003	0.906
STAT2	-0.13045	-0.0914575	0.927
AKT1S1	-0.129153	-0.0886287	0.929
HACD2	-0.124777	-0.0963758	0.923
SLC1A5	-0.124333	-0.0964394	0.923
YWHAZ	-0.123932	-0.123953	0.901
TECR	-0.123687	-0.102428	0.918
NAA20	-0.12291	-0.0943331	0.925
IDH3G	-0.122342	-0.0984524	0.922
ENO1	-0.119988	-0.112119	0.911
CD247	-0.117527	-0.11287	0.91
ITK	-0.116912	-0.107033	0.915
NRAS	-0.116437	-0.0936306	0.925
GPI	-0.116215	-0.104236	0.917
HLA-A	-0.114767	-0.117106	0.907
PRDX1	-0.114018	-0.109181	0.913
NFE2L2	-0.113224	-0.0907168	0.928
HSF1	-0.112494	-0.0944768	0.925
IL32	-0.111393	-0.113671	0.909
DGUOK	-0.109815	-0.0942225	0.925
FDX1	-0.109099	-0.0863573	0.931
PPAT	-0.108874	-0.0781655	0.938
UCK1	-0.108527	-0.0753511	0.94
SH3BP2	-0.106487	-0.0852352	0.932
ARPC4	-0.10587	-0.105275	0.916
COX8A	-0.104727	-0.0982531	0.922
IL4R	-0.102607	-0.0859494	0.932
ATP6V1F	-0.101077	-0.0887295	0.929
IRF4	-0.100352	-0.0848286	0.932
NDUFB1	-0.100089	-0.0883938	0.93
BTBD6	-0.0996574	-0.07314	0.942
MTHFD1L	-0.0994167	-0.0765624	0.939
IL10RA	-0.0992441	-0.0869274	0.931
DGLUCY	-0.0991856	-0.0753146	0.94
NOTCH1	-0.0975768	-0.0821091	0.935
TGFBR2	-0.097327	-0.0788992	0.937
CHMP2A	-0.0970764	-0.0776973	0.938
PSMB3	-0.0963073	-0.0871399	0.931
NDUFB9	-0.0954795	-0.0835327	0.933
BATF	-0.0952626	-0.0802136	0.936
DERA	-0.091746	-0.0640985	0.949
RPIA	-0.0909788	-0.0746753	0.94
MLST8	-0.0909298	-0.0653858	0.948
NOD2	-0.0902487	-0.0638403	0.949
NEDD8	-0.0901919	-0.0791825	0.937
CDC26	-0.0888137	-0.0706193	0.944
SDHC	-0.0881965	-0.071387	0.943
BCL2	-0.0881642	-0.0701033	0.944
COX7C	-0.0880593	-0.0783906	0.938
HK1	-0.0878892	-0.0774472	0.938
PIK3R1	-0.0873038	-0.0695518	0.945
CALM1	-0.0865008	-0.0722416	0.942
CTPS1	-0.0848749	-0.0661712	0.947
NR3C1	-0.0775416	-0.0679171	0.946
NUP205	-0.0772907	-0.0604325	0.952
EEA1	-0.0766321	-0.0562424	0.955
ECHS1	-0.0762132	-0.0525096	0.958
PLCB2	-0.0745129	-0.0619965	0.951
MAP3K14	-0.0731693	-0.0576405	0.954
CHMP6	-0.0724765	-0.0552445	0.956
TGFB1	-0.0724458	-0.0667355	0.947
GZMH	-0.0722611	-0.0562643	0.955
GLUL	-0.0721052	-0.0600643	0.952
WASHC4	-0.0720186	-0.0547927	0.956
OGDH	-0.0719993	-0.0647249	0.948
GCLC	-0.0715147	-0.0486265	0.961
PRIM1	-0.0712952	-0.0529542	0.958
HLA-C	-0.0700904	-0.0714312	0.943
UCKL1	-0.0693696	-0.0579378	0.954
NUP62	-0.0690718	-0.0547394	0.956
ARAF	-0.0690039	-0.0499831	0.96
PPP3CA	-0.0680946	-0.0472671	0.962
NDUFA6	-0.0668312	-0.0588587	0.953
MAT2A	-0.0647337	-0.0584358	0.953
TXN2	-0.0646482	-0.0519947	0.959
SELPLG	-0.0645986	-0.0446148	0.964
COX5A	-0.0644743	-0.0596939	0.952
CTSZ	-0.0642642	-0.0542361	0.957
MAPK8	-0.0640601	-0.0450769	0.964
PFKP	-0.063972	-0.0553046	0.956
FKBP1A	-0.0631017	-0.0421573	0.966
PSMB1	-0.0625332	-0.0535216	0.957
ATG101	-0.0605936	-0.0445315	0.964
HLA-DRB1	-0.060524	-0.057601	0.954
TIMM23	-0.0602701	-0.0476232	0.962
MT2A	-0.0602013	-0.0547592	0.956
CD4	-0.0580081	-0.0518833	0.959
SDHB	-0.0558455	-0.046504	0.963
CTSA	-0.0556976	-0.0450007	0.964
CS	-0.0556701	-0.0477148	0.962
PRDX5	-0.0554279	-0.0470254	0.962
IL21R	-0.0547042	-0.0444253	0.965
IDH3A	-0.0534778	-0.0413028	0.967
TOLLIP	-0.0532823	-0.0393691	0.969
GLUD1	-0.0526053	-0.0470786	0.962
SOS1	-0.0483957	-0.0406832	0.968
STAT3	-0.0478233	-0.0425694	0.966
TYK2	-0.0468292	-0.0400082	0.968
IFI6	-0.0466109	-0.0333139	0.973
CTSW	-0.0465682	-0.0414346	0.967
PRKAB2	-0.0464163	-0.032515	0.974
AKT2	-0.0462475	-0.0394541	0.969
NME1	-0.0460509	-0.0376992	0.97
KLRC1/2	-0.0458573	-0.0357723	0.971
TRAF6	-0.0457538	-0.0329771	0.974
TALDO1	-0.0453853	-0.0386597	0.969
GAPVD1	-0.0444923	-0.036313	0.971
IL16	-0.0438919	-0.0406923	0.968
KEAP1	-0.0429802	-0.0330535	0.974
ALDOA	-0.0427741	-0.0417177	0.967
PNP	-0.0416687	-0.0361287	0.971
GLS	-0.0391258	-0.0360707	0.971
PYCR2	-0.0386529	-0.0327558	0.974
PSMB10	-0.0351471	-0.0320447	0.974
ACAP2	-0.0346	-0.0282496	0.977
CBL	-0.0340701	-0.0277625	0.978
ACSL5	-0.0324146	-0.0271245	0.978
COX6B1	-0.031975	-0.0296931	0.976
PDK2	-0.0316723	-0.0222301	0.982
ITGB1	-0.0305212	-0.0291602	0.977
APC	-0.0300567	-0.0206928	0.983
OAS2	-0.0289644	-0.0248754	0.98
RBBP5	-0.0278628	-0.0207204	0.983
FNIP1	-0.0277676	-0.0205345	0.984
OAT	-0.0260558	-0.0190586	0.985
CTSS	-0.0230003	-0.0201282	0.984
ALDOC	-0.0225011	-0.0167767	0.987
EOMES	-0.0221328	-0.015648	0.988
VHL	-0.0216013	-0.0187495	0.985
HSPA4	-0.0214584	-0.0172016	0.986
TIMELESS	-0.0212142	-0.0159837	0.987
TRIM33	-0.0196588	-0.0163694	0.987
UQCR10	-0.018664	-0.0149874	0.988
DHRS4	-0.0168165	-0.0127818	0.99
TRAF3	-0.0166457	-0.0139607	0.989
TP63	-0.0162055	-0.0105528	0.992
RRAGC	-0.0156086	-0.0119021	0.991
RPLP0	-0.0146792	-0.0149607	0.988
NMT1	-0.0142252	-0.0117868	0.991
NFKB2	-0.0138564	-0.0120083	0.99
CD200	-0.0133116	-0.00970788	0.992
PSMA6	-0.0119116	-0.0106254	0.992
TFDP1	-0.0114255	-0.00973422	0.992
SNF8	-0.0114205	-0.009627	0.992
CASP8	-0.01071	-0.00996824	0.992
GZMA	-0.0106496	-0.0107986	0.991
ERAP2	-0.00958805	-0.00837248	0.993
TBX21	-0.00925583	-0.00753403	0.994
CASP3	-0.00873537	-0.00752114	0.994
DECR1	-0.00862449	-0.00742266	0.994
WAS	-0.00828903	-0.00742587	0.994
LTA4H	-0.00794549	-0.00598841	0.995
GPX4	-0.00642541	-0.00542743	0.996
TRAF5	-0.0036987	-0.00317602	0.997
NDUFS8	-0.00306355	-0.00252994	0.998
ATF4	-0.00187424	-0.00180077	0.999
ATP5F1D	-0.00152805	-0.00128097	0.999
PRKAA1	-0.00102335	-0.000867801	0.999
LAMP1	-0.000759348	-0.000698495	0.999
NDUFB11	-0.000217811	-0.000183982	1
GNS	-0.000179633	-0.00012691	1
HLA-E	-9.3865e-05	-9.3126e-05	1
SLAMF6	0.000152517	0.000134082	1
DVL2	0.000521038	0.000362143	1
ICAM1	0.000833182	0.000618716	1
RAE1	0.00274152	0.00214661	0.998
GATA3	0.00517378	0.00469037	0.996
SKP1	0.00704158	0.00658159	0.995
GNG10	0.00734245	0.00512083	0.996
RELA	0.00778941	0.00639735	0.995
CHMP4A	0.00811599	0.00724439	0.994
NDUFA1	0.00840527	0.00785108	0.994
KAT6A	0.00956107	0.0084239	0.993
CD27	0.00975899	0.00865733	0.993
IFNAR1	0.0105589	0.00833861	0.993
ACAA2	0.0109885	0.00902319	0.993
NEU1	0.0115524	0.0085792	0.993
CD45R0	0.0122405	0.0121784	0.99
COX7A2	0.0123128	0.0113572	0.991
SERINC1	0.0123939	0.0109891	0.991
FLCN	0.0140019	0.0106775	0.991
LDHA	0.0141719	0.013812	0.989
HADH	0.0177434	0.0130063	0.99
UQCRQ	0.0184454	0.0157741	0.987
PARP1	0.0188208	0.0161939	0.987
TXNRD1	0.0191221	0.0161551	0.987
COX5B	0.0204166	0.0186477	0.985
NDUFA4	0.0207921	0.0191363	0.985
IRF5	0.0210095	0.0143366	0.989
RPL23	0.0228401	0.0231278	0.982
SERINC3	0.02419	0.0210821	0.983
CREB1	0.0242603	0.0206604	0.984
NDUFB10	0.0254211	0.0215549	0.983
HADHB	0.0258353	0.0215194	0.983
PSMA3	0.0260883	0.0226237	0.982
SMURF1	0.0274317	0.0191437	0.985
SEC22B	0.0274581	0.0214557	0.983
FASN	0.0295235	0.0239086	0.981
ADD1	0.0295776	0.0257019	0.979
PGD	0.0318532	0.0251666	0.98
TFB2M	0.0325455	0.0238614	0.981
MAP2K7	0.0326729	0.0257686	0.979
ISG15	0.033522	0.0270367	0.978
COX4I1	0.0340596	0.0315984	0.975
SLC2A14	0.0351411	0.0330982	0.974
USP8	0.0368769	0.0292707	0.977
STAT4	0.0369331	0.0287859	0.977
CAB39	0.0369533	0.0327109	0.974
PDPK1	0.0375576	0.0284692	0.977
SLC16A1	0.037683	0.0285036	0.977
BIRC3	0.0379466	0.0274242	0.978
PRICKLE3	0.0392163	0.0260118	0.979
CHMP3	0.0392555	0.0307923	0.975
UBA5	0.0399057	0.0315501	0.975
OASL	0.0405026	0.0307767	0.975
BRAF	0.0409523	0.0314242	0.975
STAT5A	0.0416553	0.0330243	0.974
COX7B	0.0438736	0.0394816	0.969
PGM2	0.0449866	0.0341054	0.973
NADK	0.0454833	0.035488	0.972
TFRC	0.0476534	0.043679	0.965
HEXB	0.0478358	0.038056	0.97
GAPDH	0.0480982	0.0490829	0.961
NDUFAB1	0.0501649	0.0438894	0.965
ME2	0.0512238	0.0378516	0.97
CD63	0.0519327	0.0475419	0.962
REST	0.0528434	0.0443132	0.965
SMAD2	0.0535808	0.044297	0.965
TGFBR1	0.0537272	0.0420721	0.966
MAP2K2	0.0540024	0.0453743	0.964
IRF1	0.0563282	0.0513262	0.959
MFN2	0.0568932	0.0435122	0.965
SOD1	0.0587094	0.0531652	0.958
TP53	0.0596342	0.0495135	0.961
SOS2	0.0598577	0.0434964	0.965
NOTCH2	0.0604112	0.0492444	0.961
ACADVL	0.0618607	0.057468	0.954
UBE2I	0.0620206	0.0529773	0.958
SOCS4	0.0624146	0.0484696	0.961
ITCH	0.0637942	0.0542761	0.957
SREBF1	0.0664902	0.0489964	0.961
FABP5	0.0672805	0.0626253	0.95
FAS	0.0675356	0.057193	0.954
ATP5PD	0.0683789	0.058535	0.953
CDKN1A	0.0702081	0.0554233	0.956
CTNNA1	0.070874	0.0567314	0.955
ACAT1	0.0718497	0.0514843	0.959
DCK	0.0719657	0.0630185	0.95
ITGAM	0.0732463	0.0523405	0.958
SHMT2	0.0744716	0.0588603	0.953
MAP3K7	0.0755025	0.0605863	0.952
SMAD3	0.0757709	0.0647245	0.948
PPIA	0.0769354	0.0783509	0.938
AKT1	0.0769998	0.0649092	0.948
ARF5	0.0771296	0.0622538	0.95
HSPE1	0.0774838	0.0720356	0.943
NCOA2	0.0776183	0.0608206	0.952
OPA1	0.0777776	0.0626963	0.95
STK11	0.0783972	0.0655825	0.948
TIMM17A	0.0789892	0.0629621	0.95
CD99	0.0822692	0.0753511	0.94
ALDH3A2	0.0823852	0.0641022	0.949
SOCS5	0.0827773	0.0554233	0.956
TSC2	0.0830043	0.0623575	0.95
CD6	0.0836724	0.0725123	0.942
BRCC3	0.083897	0.0634077	0.949
NDUFB7	0.0845485	0.0713937	0.943
POLE	0.084761	0.0660479	0.947
NFS1	0.0862201	0.0632399	0.95
LCK	0.0866869	0.0826595	0.934
ARID1A	0.0869956	0.0716619	0.943
LAMTOR1	0.0886012	0.0654548	0.948
CAT	0.0893009	0.0703226	0.944
SLC3A2	0.0901626	0.0752195	0.94
PFKL	0.0909732	0.0810022	0.935
GZMM	0.0950634	0.0711825	0.943
CPT1A	0.0957631	0.0776356	0.938
RDH14	0.0960868	0.0677207	0.946
ICOS	0.0963978	0.0795669	0.937
OMA1	0.0973992	0.0706843	0.944
MAGED1	0.0989021	0.0738666	0.941
TICAM1	0.101208	0.077615	0.938
PDK1	0.101409	0.0717697	0.943
COX6C	0.102094	0.0969129	0.923
GLYCTK	0.10381	0.0699763	0.944
CD3E	0.104306	0.101846	0.919
ZNF136	0.104471	0.0720926	0.943
PRKCB	0.105705	0.0909027	0.928
H6PD	0.106415	0.0769245	0.939
CD84	0.109057	0.0983545	0.922
TELO2	0.110163	0.0772698	0.938
MTHFD2	0.112556	0.0937502	0.925
NDUFA2	0.115139	0.0817107	0.935
MTF1	0.115162	0.0833325	0.934
PPP2R5D	0.115372	0.0911913	0.927
TRIM34	0.116263	0.0767218	0.939
UBE2T	0.116769	0.086329	0.931
ACOT2	0.118406	0.085417	0.932
FANCD2	0.122168	0.0909812	0.928
MPC2	0.122813	0.0997683	0.921
GBA	0.123555	0.0911246	0.927
ADORA2A	0.12437	0.0978637	0.922
GMPS	0.125419	0.0942105	0.925
MAP1LC3	0.125627	0.107538	0.914
CCNC	0.12593	0.0991857	0.921
EGR1	0.126711	0.0921048	0.927
PRPS1	0.127563	0.0917304	0.927
ATG2B	0.128242	0.0991899	0.921
HACD4	0.128477	0.103819	0.917
ODC1	0.129246	0.106865	0.915
SLC25A6	0.129341	0.122555	0.902
KDM3B	0.133225	0.104836	0.917
IL12RB1	0.135056	0.114408	0.909
MTHFD1	0.136112	0.115489	0.908
NFAT5	0.139946	0.100023	0.92
ATF7	0.140031	0.109682	0.913
HEXA	0.14084	0.114306	0.909
PTPRC	0.141982	0.138298	0.89
KMT2E	0.142822	0.120918	0.904
NCOR1	0.143798	0.126202	0.9
GUSB	0.144492	0.120122	0.904
MSH2	0.144576	0.110318	0.912
JUN	0.145589	0.139463	0.889
NSD1	0.14658	0.123087	0.902
PIK3R4	0.147839	0.105826	0.916
CXCR4	0.14901	0.143644	0.886
RRM1	0.150652	0.113226	0.91
VPS28	0.151096	0.131775	0.895
PRKAG1	0.151674	0.115278	0.908
IFITM3	0.154225	0.106135	0.915
MAF	0.154239	0.138699	0.89
CTNNB1	0.155729	0.142839	0.886
ATF7IP	0.158005	0.139584	0.889
VSIR	0.160957	0.110234	0.912
PRR5	0.161576	0.116759	0.907
RAC2	0.164392	0.162937	0.871
PPM1A	0.164533	0.137828	0.89
FH	0.165652	0.128098	0.898
MAX	0.166122	0.147343	0.883
TBK1	0.167382	0.130895	0.896
PCK2	0.170189	0.127202	0.899
ZAP70	0.171431	0.163822	0.87
AHR	0.172466	0.15125	0.88
TRIM26	0.172588	0.141421	0.888
HSPA9	0.175865	0.14168	0.887
HMOX1	0.178163	0.127602	0.898
MID1IP1	0.181962	0.137553	0.891
ARID2	0.182341	0.152227	0.879
KMT2A	0.183298	0.155429	0.876
RB1CC1	0.184442	0.137045	0.891
PIK3CA	0.188931	0.141959	0.887
GRK2	0.188956	0.174593	0.861
CD3G	0.189178	0.175715	0.861
ASH1L	0.189785	0.158521	0.874
FANCA	0.192563	0.143405	0.886
CD96	0.192678	0.170996	0.864
JUNB	0.192721	0.18515	0.853
CKAP5	0.195371	0.152393	0.879
PIK3CD	0.197088	0.183148	0.855
TET2	0.197683	0.155476	0.876
UBE2F	0.200709	0.164832	0.869
TOMM6	0.200947	0.152308	0.879
TPR	0.202609	0.161977	0.871
PSMD13	0.206308	0.176472	0.86
MAPKAP1	0.207763	0.166646	0.868
NFKBIA	0.209362	0.204457	0.838
CTCF	0.211255	0.178189	0.859
RICTOR	0.211828	0.162655	0.871
NSD2	0.216701	0.185953	0.852
WDR45	0.218152	0.153496	0.878
COL6A3	0.220635	0.162622	0.871
EPC1	0.220661	0.176724	0.86
NPM1	0.220742	0.222574	0.824
NCAPG2	0.222131	0.180066	0.857
ADK	0.222399	0.176238	0.86
PTEN	0.225874	0.204401	0.838
CTLA4	0.226592	0.211449	0.833
PRKAG2	0.228962	0.170886	0.864
CDC42	0.230223	0.222475	0.824
NKG7	0.230338	0.230644	0.818
MAP2K1	0.230712	0.190695	0.849
MR1	0.231407	0.153297	0.878
PRKAB1	0.234195	0.173491	0.862
RNASEL	0.236829	0.164426	0.869
SMAD4	0.237028	0.192757	0.847
RORA	0.237521	0.190797	0.849
ATXN7	0.239105	0.200025	0.841
CD3D	0.241147	0.24229	0.809
HLA-DRA	0.241796	0.233356	0.815
SLC2A1	0.241797	0.167019	0.867
JAK1	0.241918	0.222398	0.824
GLUD1/2	0.245137	0.219794	0.826
PTPN6	0.24522	0.217618	0.828
D2HGDH	0.249989	0.184612	0.854
PCCA	0.25322	0.170713	0.864
HPRT1	0.253418	0.219466	0.826
COX16	0.256875	0.182415	0.855
GSK3B	0.258597	0.207808	0.835
CCL1	0.259577	0.196875	0.844
ATOX1	0.260405	0.193246	0.847
ATP5MG	0.268711	0.221645	0.825
TAOK2	0.274204	0.207003	0.836
PGAM1	0.275213	0.263058	0.793
RPS6KB1	0.277772	0.223749	0.823
SLC25A20	0.279565	0.229966	0.818
ERN1	0.280842	0.227164	0.82
SLC7A5	0.280864	0.239769	0.811
CTSD	0.283215	0.257896	0.796
GZMB	0.286019	0.281523	0.778
FANCI	0.286712	0.22627	0.821
PDP1	0.288722	0.206643	0.836
MAP2K3	0.296196	0.247143	0.805
KANSL1	0.299851	0.239774	0.811
PRIM2	0.302227	0.239141	0.811
PSMA2	0.303861	0.275755	0.783
CD8A	0.30392	0.28325	0.777
UBE2V1	0.305958	0.285593	0.775
FOS	0.309118	0.30481	0.761
RPS6KA1	0.311403	0.272665	0.785
FASLG	0.31392	0.234175	0.815
CCL5	0.316359	0.310245	0.756
COPS6	0.32025	0.279529	0.78
AK3	0.326678	0.255295	0.798
LAG3	0.327776	0.301053	0.763
MYBL2	0.32781	0.262415	0.793
MLYCD	0.330704	0.225723	0.821
NCAPD2	0.33896	0.292184	0.77
ID2	0.339205	0.323327	0.746
PRDM1	0.33986	0.283269	0.777
TNFRSF4	0.347584	0.269828	0.787
HERC1	0.34872	0.30882	0.757
DUSP1	0.348835	0.342106	0.732
PIK3C2A	0.349855	0.261446	0.794
GABARAP	0.351495	0.326293	0.744
ASL	0.352009	0.258818	0.796
GADD45B	0.355892	0.278161	0.781
ARID1B	0.35722	0.282848	0.777
PSMC1	0.358225	0.287545	0.774
KMT2D	0.358505	0.292708	0.77
KPNA2	0.365934	0.317864	0.751
SQSTM1	0.370077	0.317287	0.751
NCAPH	0.377826	0.300665	0.764
SLC27A3	0.37864	0.274691	0.784
GNAI2	0.382244	0.378627	0.705
CDCA5	0.39041	0.294925	0.768
TPX2	0.392111	0.29437	0.768
FOSB	0.397266	0.364081	0.716
SGO2	0.39837	0.282156	0.778
RRM2	0.398949	0.358067	0.72
TOX	0.401135	0.347907	0.728
TGIF2	0.40633	0.292101	0.77
TK1	0.422606	0.310981	0.756
CX3CR1	0.422749	0.322831	0.747
ATP5MF	0.42327	0.329952	0.741
BUB1B	0.426629	0.314672	0.753
CLSPN	0.434697	0.332063	0.74
CDK9	0.43704	0.34799	0.728
STAM2	0.439054	0.303174	0.762
FOXM1	0.450003	0.329334	0.742
CD69	0.450871	0.412984	0.68
EZH2	0.456446	0.377222	0.706
TIGIT	0.461209	0.390598	0.696
HDAC7	0.462219	0.369893	0.711
PDK3	0.468445	0.336004	0.737
RANBP2	0.475089	0.379711	0.704
CCL4	0.480611	0.471968	0.637
HIF1A	0.480837	0.446056	0.656
TYMS	0.480879	0.412469	0.68
CENPA	0.482926	0.342199	0.732
BRIP1	0.485705	0.347211	0.728
IL2RB	0.493914	0.462886	0.643
KIF2C	0.49725	0.363201	0.716
ENTPD1	0.507035	0.451139	0.652
SMC2	0.50902	0.419034	0.675
PLK1	0.53128	0.414947	0.678
PRF1	0.542301	0.537869	0.591
IFNG	0.542691	0.511599	0.609
PDCD1	0.548773	0.429804	0.667
GNLY	0.55313	0.475207	0.635
UBE2C	0.554639	0.456042	0.648
CCNA2	0.558332	0.468446	0.639
IKZF2	0.561009	0.387661	0.698
BUB1	0.562503	0.433438	0.665
GTSE1	0.566683	0.431339	0.666
TNFRSF18	0.570706	0.497121	0.619
CDCA8	0.575329	0.394983	0.693
RUNX3	0.576175	0.501902	0.616
NEK2	0.582541	0.420288	0.674
CCL4/L1	0.586986	0.563825	0.573
CD7	0.590208	0.483533	0.629
MKI67	0.590896	0.492579	0.622
FYN	0.592224	0.555042	0.579
HJURP	0.609476	0.449451	0.653
DDIT4	0.66122	0.563512	0.573
CD80	0.694905	0.481476	0.63
HAVCR2	0.738216	0.624096	0.533
CDC20	0.738437	0.606779	0.544
CMIP	0.774594	0.555222	0.579
CCNB2	0.791327	0.589871	0.555
SIK1	0.803525	0.614507	0.539
TNFSF9	0.856034	0.612805	0.54
CCL3/L1	0.869063	0.83632	0.403
CXCR6	0.919651	0.817956	0.413
CD8B	0.994472	0.793095	0.428
SLC2A8	1.02238	0.711126	0.477
RDH10	1.07402	0.948202	0.343
ITGA1	1.08487	0.755462	0.45
ZNF43	1.106	0.756813	0.449
NFIL3	1.20788	0.896031	0.37
CXCL13	1.29251	1.02964	0.303
TNFRSF9	1.44458	1.11184	0.266
XCL1/2	1.54594	1.17229	0.241
